# Supplementary material
Source: PubMed Central journal article supplement (PMC30675)
Supplement: pnas_051634598_2.pdf [file pnas_051634598_2.pdf]

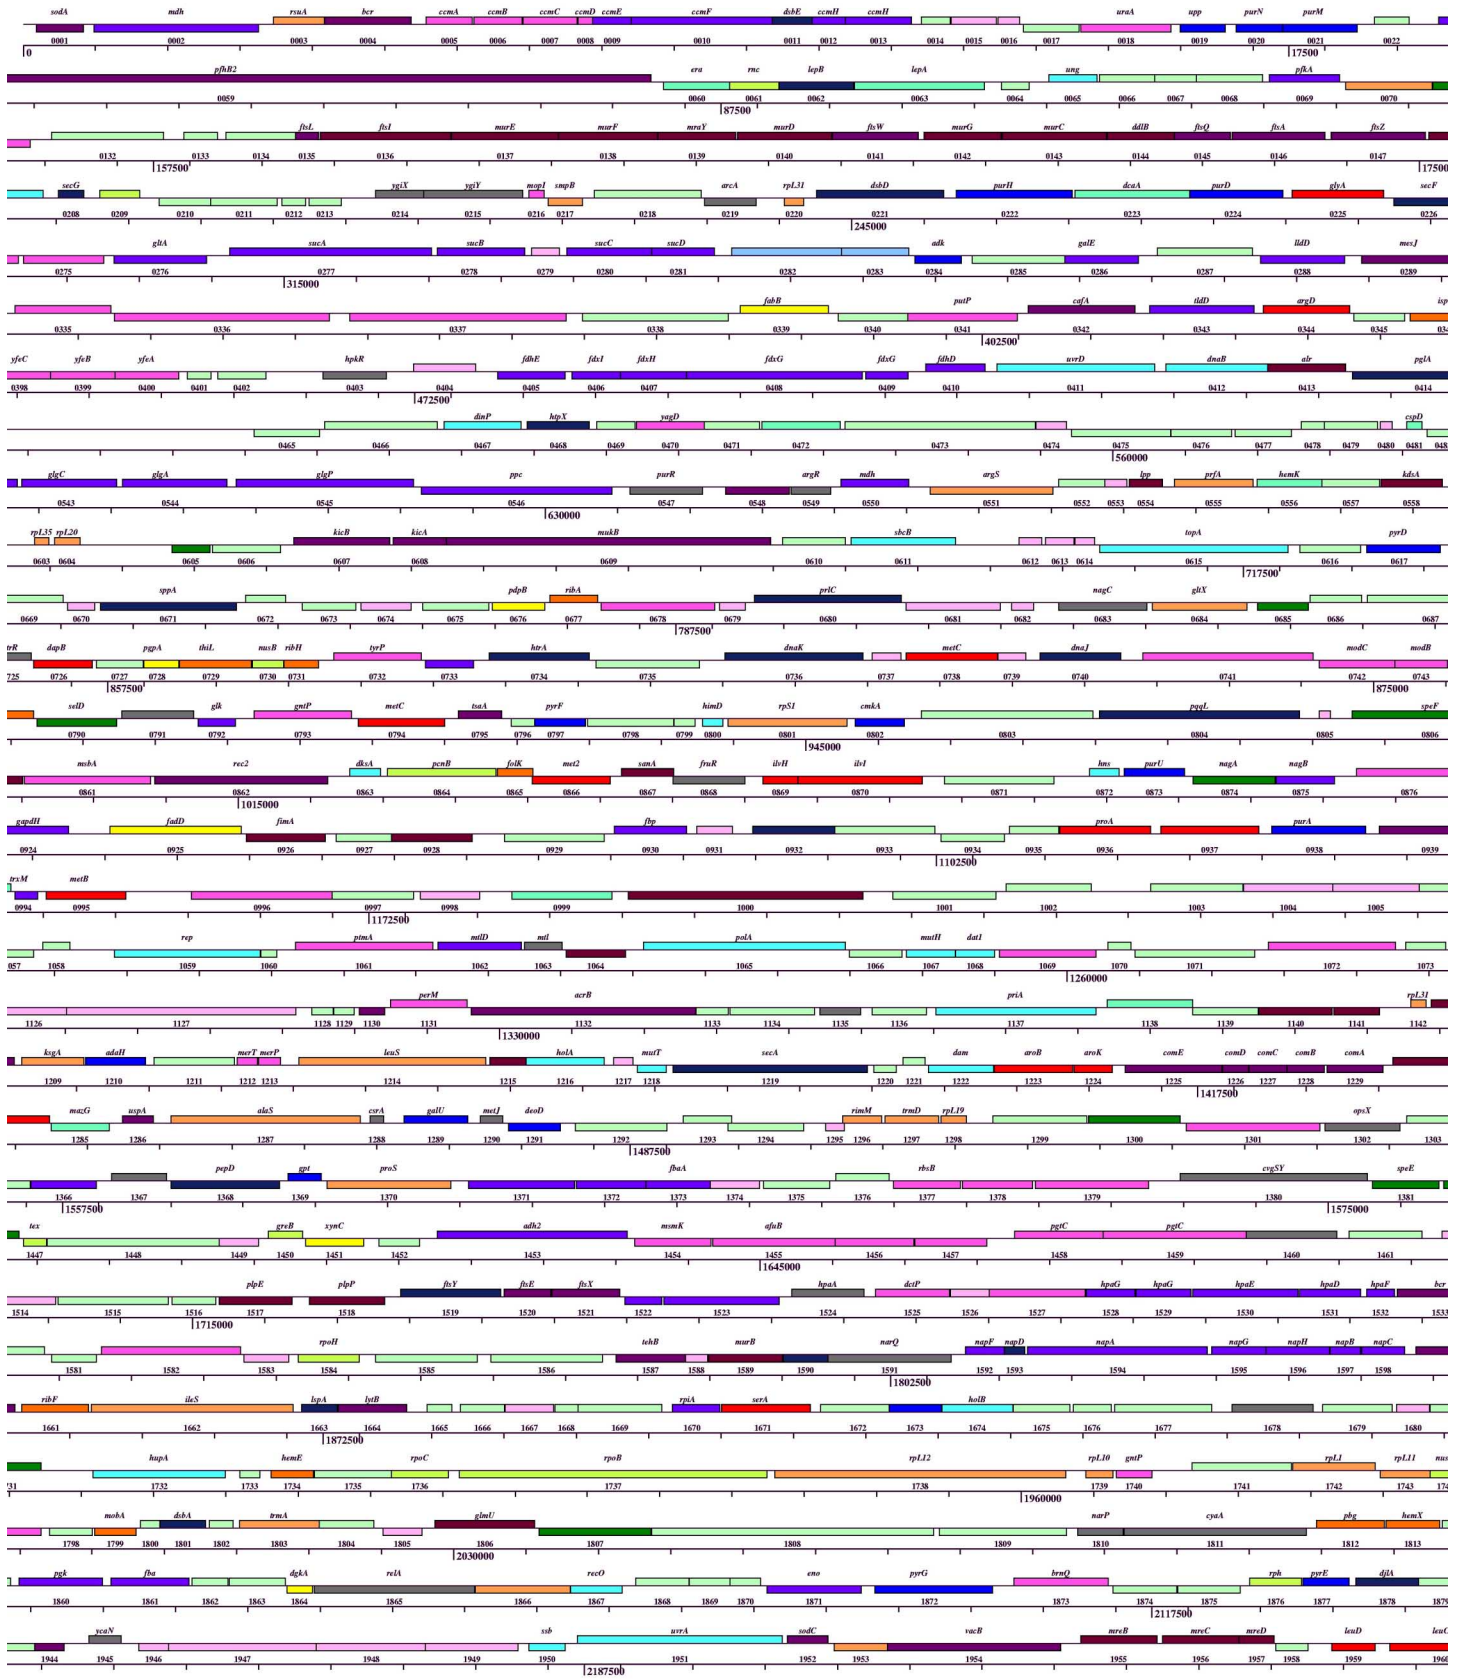

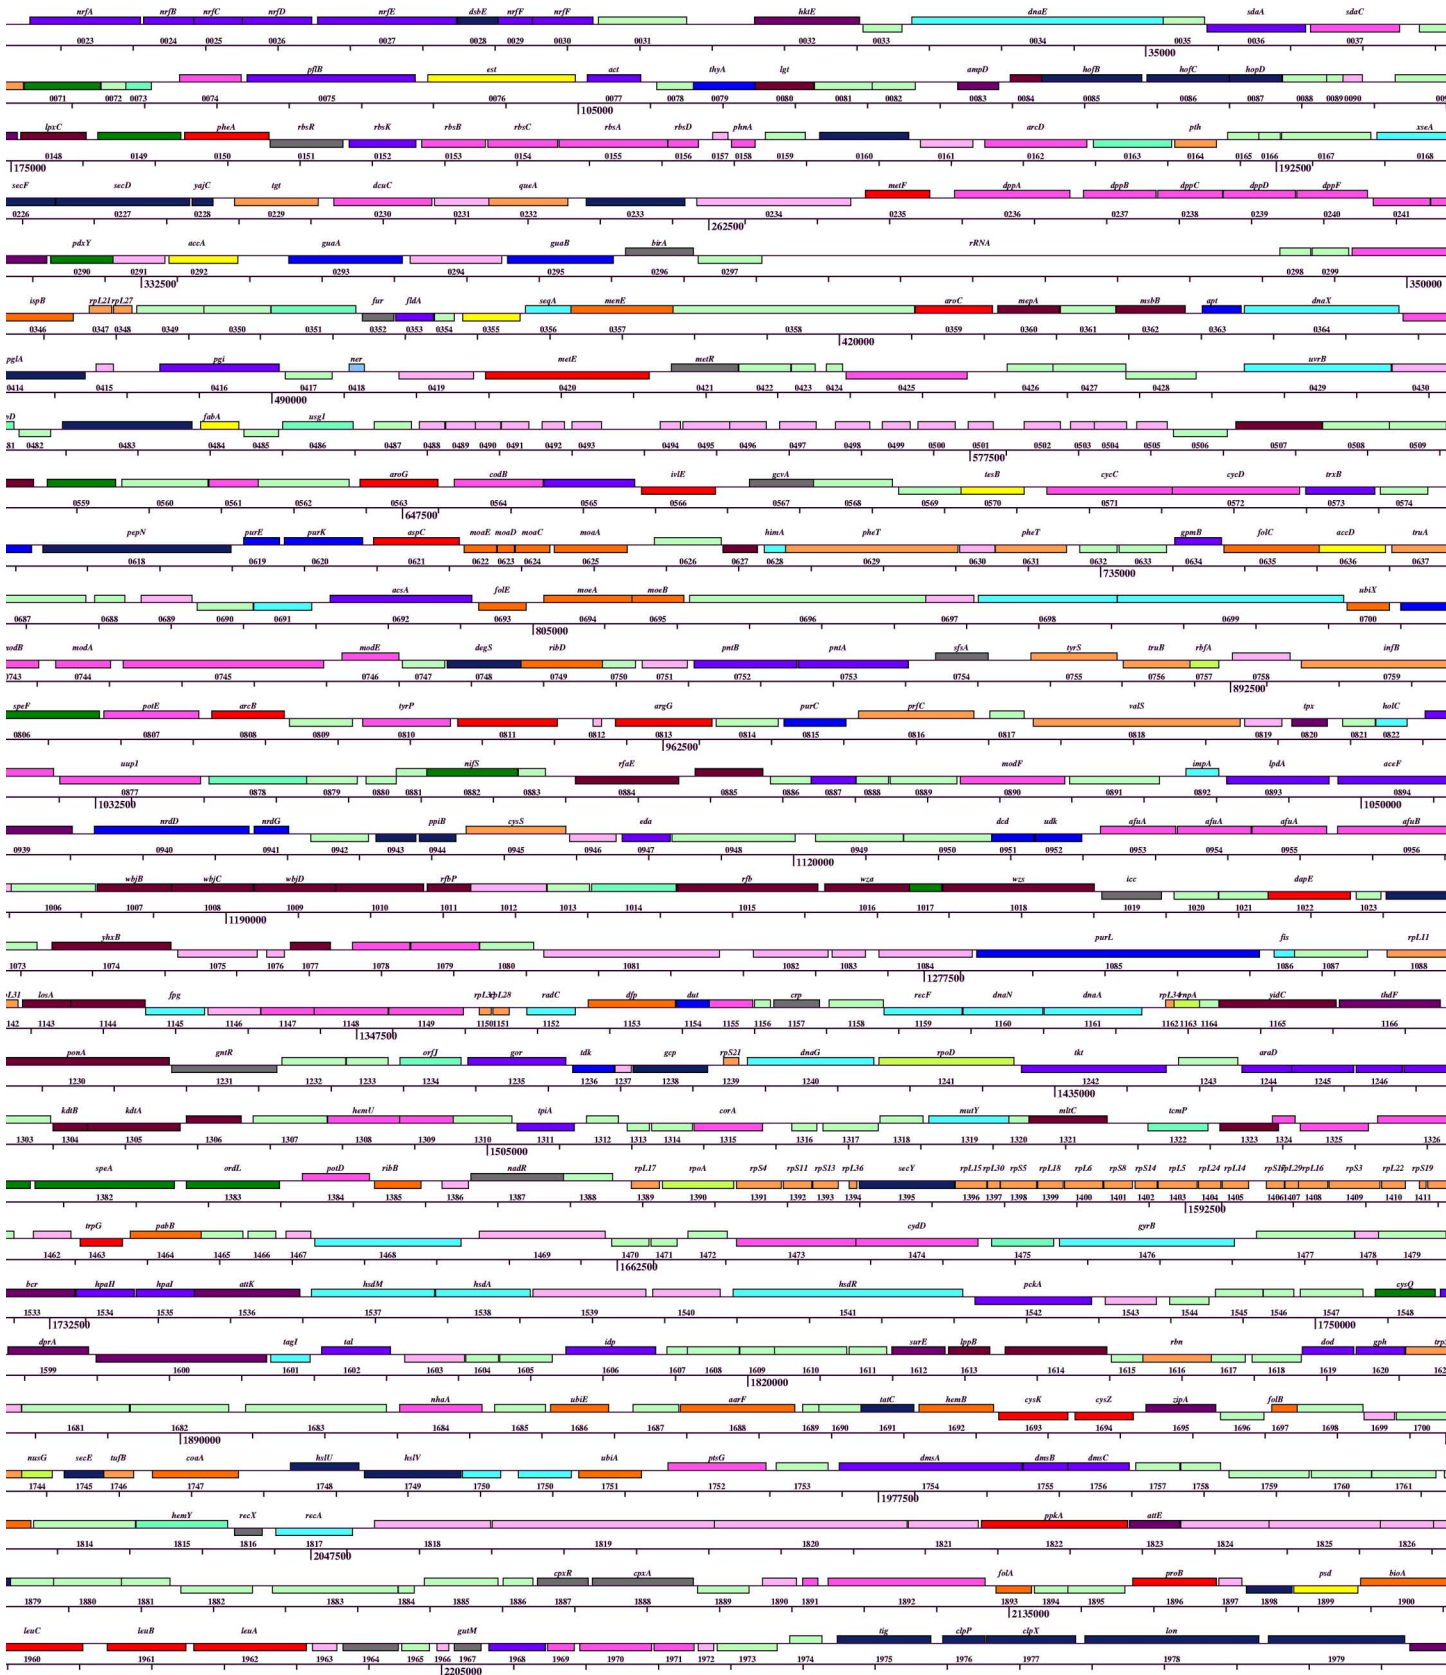

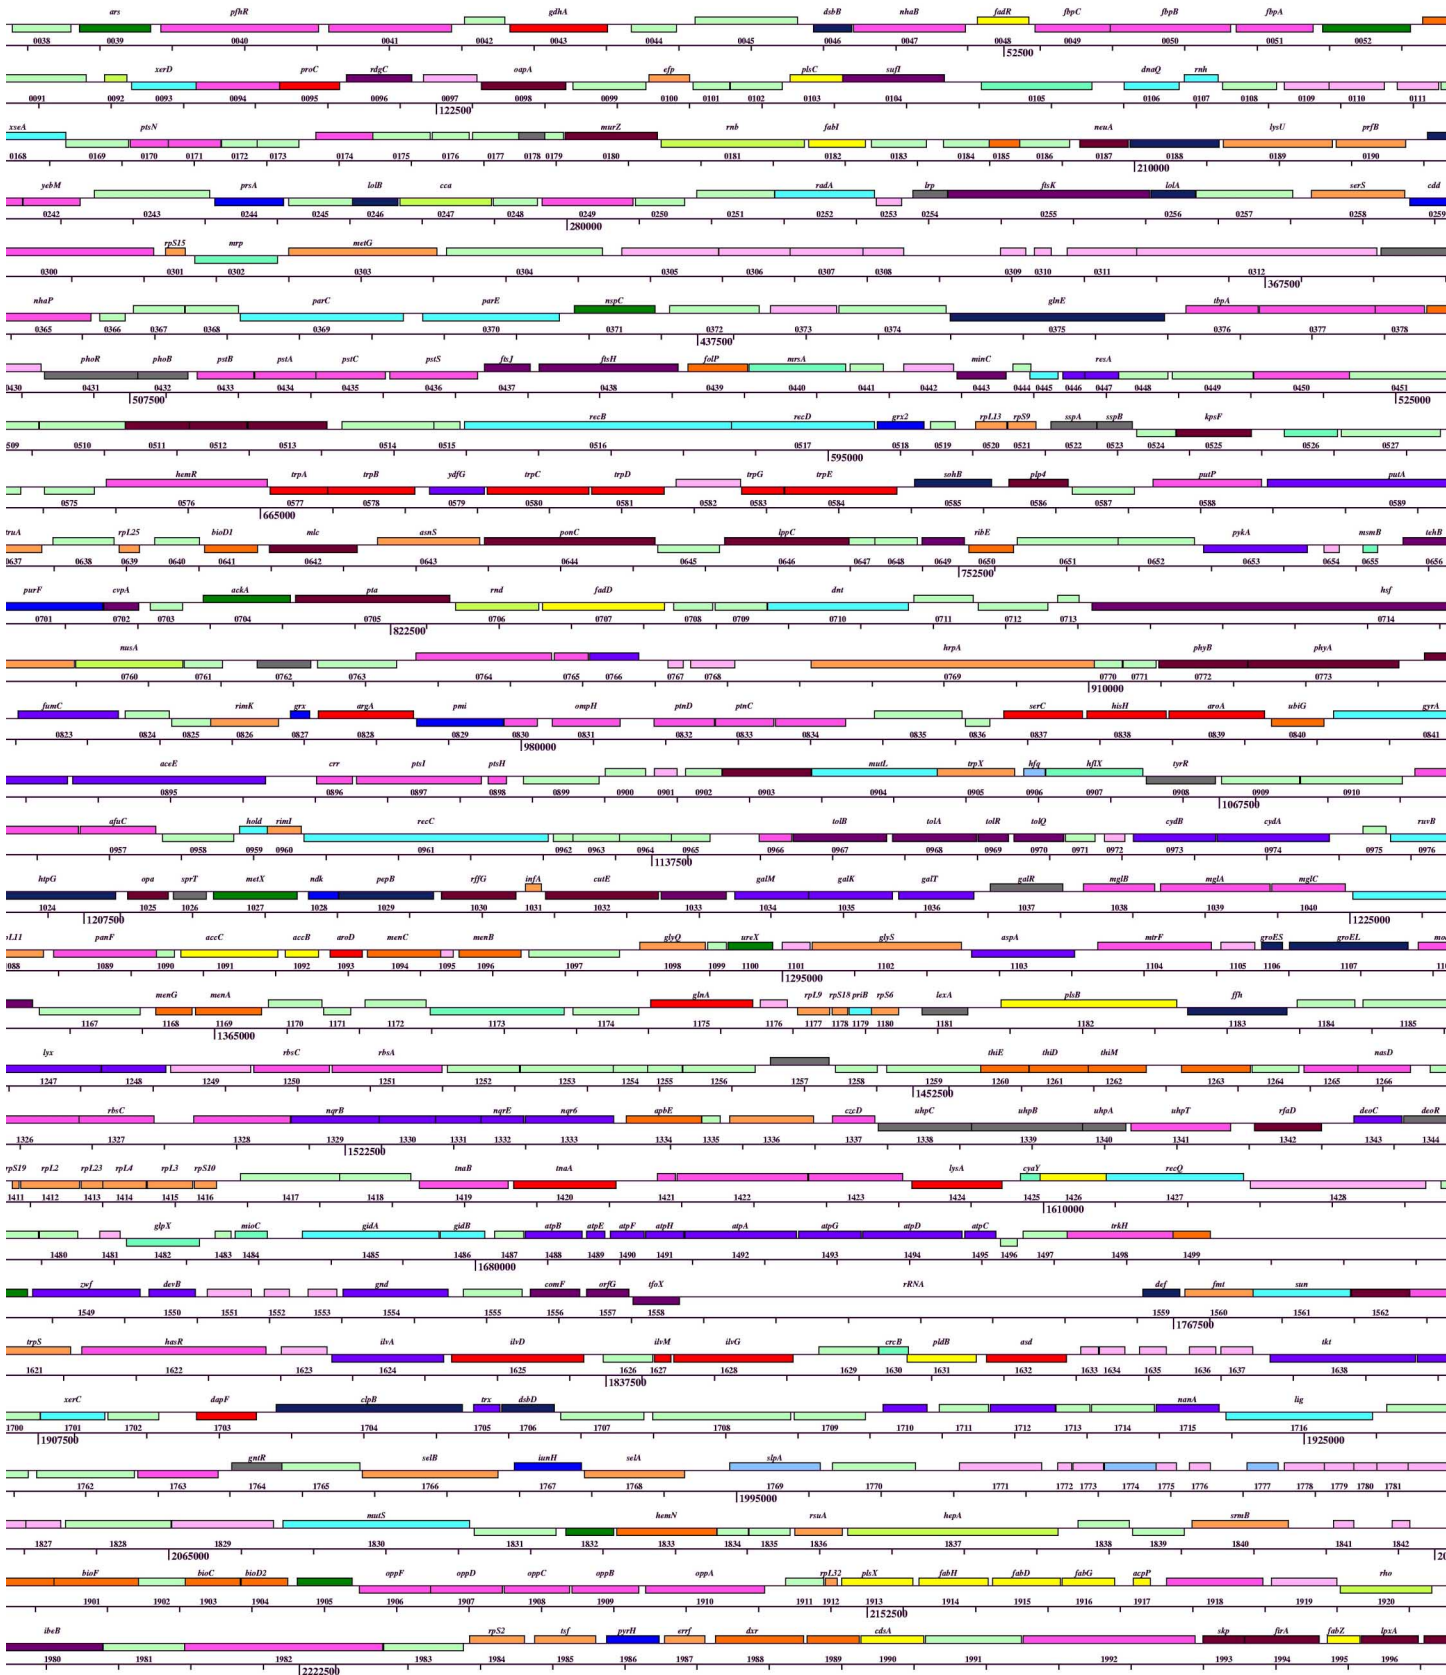

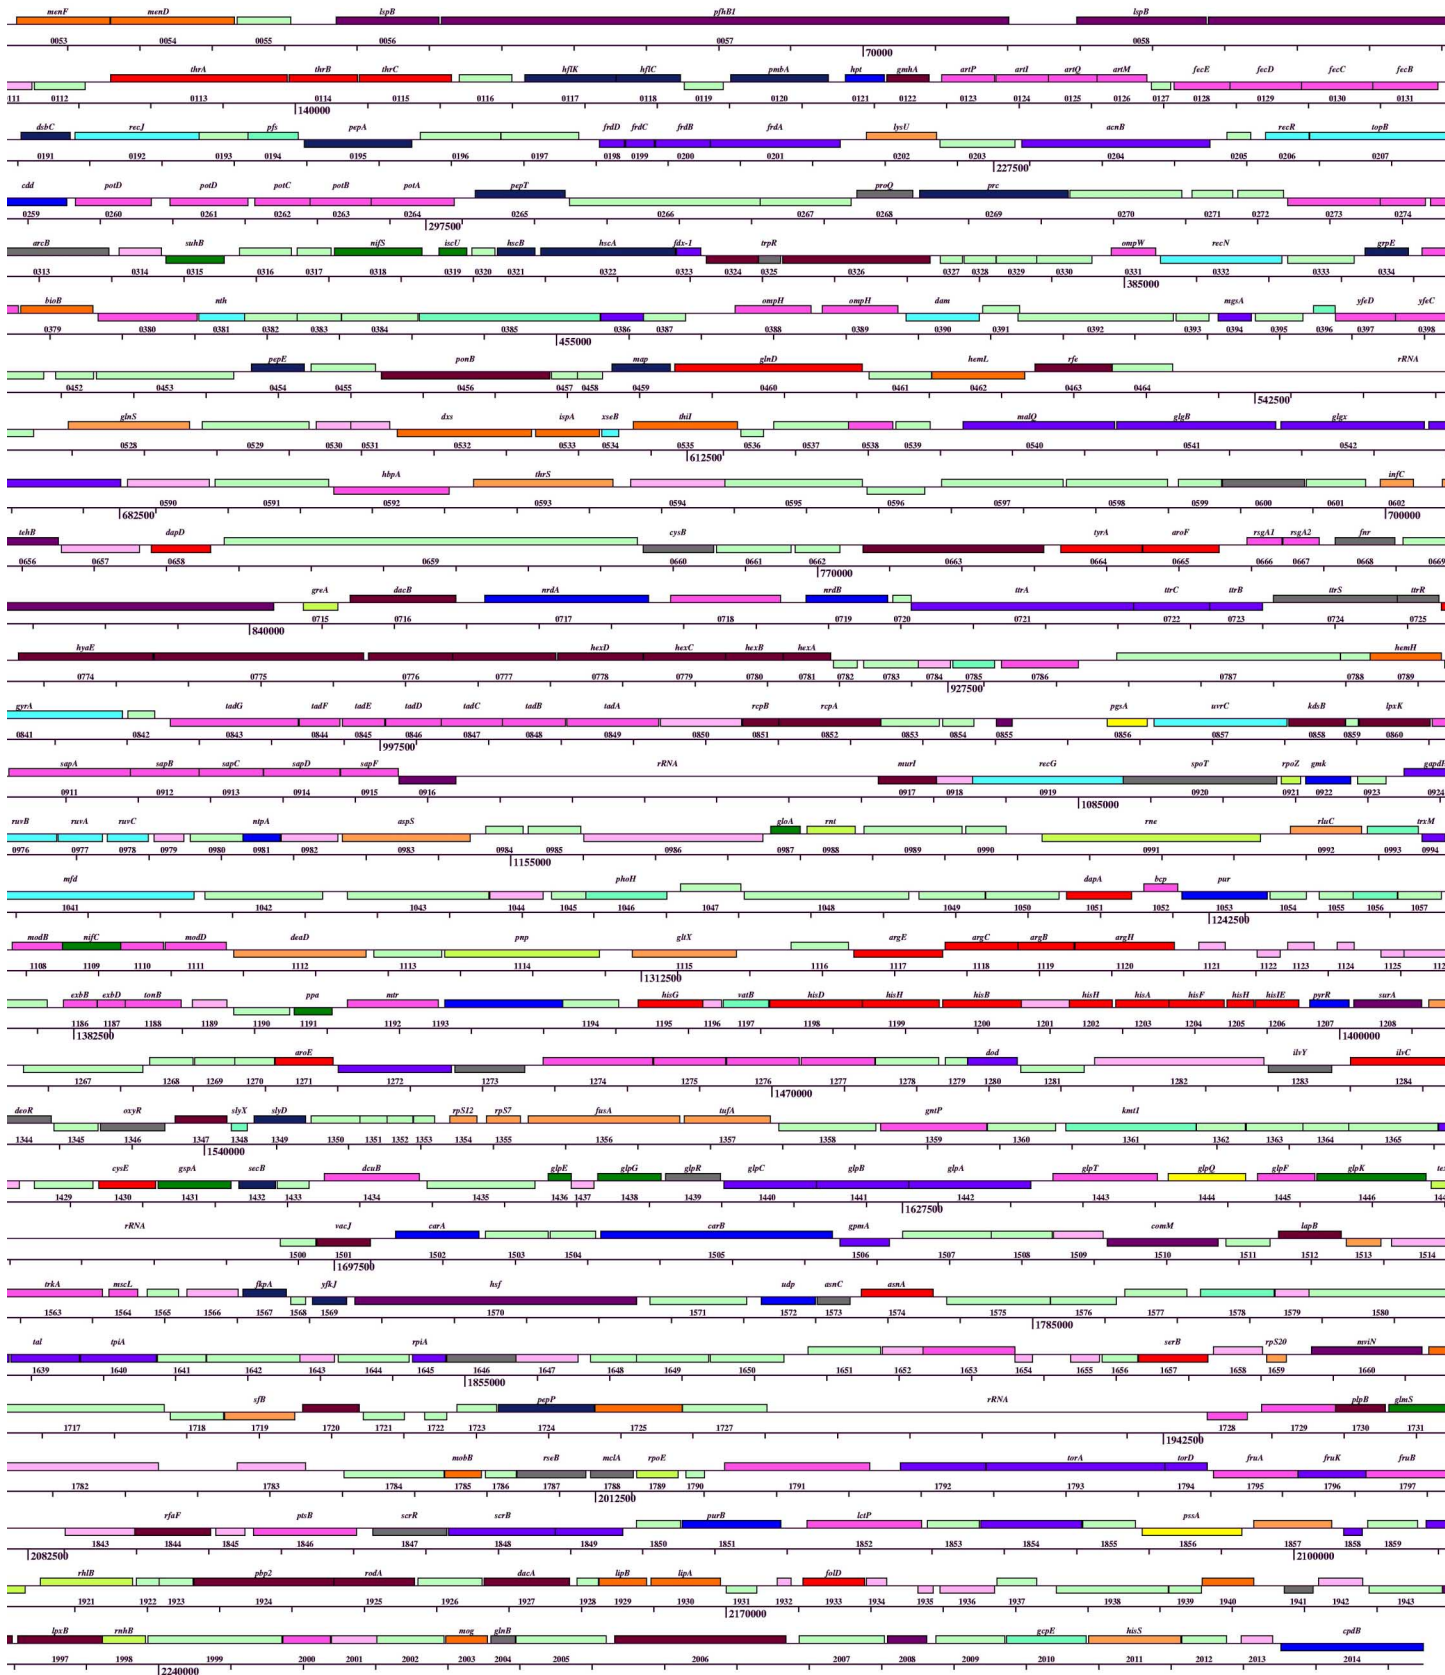

-  Amino acid biosynthesis
-  Purines, pyrimidines, nucleosides, nucleotides
-  Fatty acid and phospholipid metabolism
-  Biosynthesis of cofactors, prosthetic groups, and carriers
-  Central and intermediary metabolism
-  Energy metabolism
-  Transport and binding proteins
-  DNA metabolism
-  Transcription
-  Protein synthesis
-  Protein fate
-  Regulatory function
-  Cell envelope
-  Cellular processes
-  Other functions
-  Unknown
-  Hypothetical
-  No homologues
