# Supplementary material
Source: PubMed Central journal article supplement (PMC30675)
Supplement: pnas_051634598_3.pdf [file pnas_051634598_3.pdf]

**Table 3.** Functional classification of the 2014 potential coding sequences in *Pasteurella multocida*

| AMINO ACID BIOSYNTHESIS     |                                                                                 |             |                                                       |                                                                         |              |                                                   |                                                               |             |
|-----------------------------|---------------------------------------------------------------------------------|-------------|-------------------------------------------------------|-------------------------------------------------------------------------|--------------|---------------------------------------------------|---------------------------------------------------------------|-------------|
| <i>Aromatic amino acids</i> |                                                                                 |             |                                                       |                                                                         |              |                                                   |                                                               |             |
| PM0150                      | chorismate mutase prephenate dehydratase                                        | <i>pheA</i> | PM0813                                                | carbamoyltransferase                                                    |              | PM0940                                            | anaerobic ribonucleoside-triphosphate reductase               | <i>nrdD</i> |
| PM0359                      | chorismate synthase                                                             | <i>aroC</i> | PM0828                                                | argininosuccinate synthetase                                            | <i>argG</i>  | PM0941                                            | anaerobic ribonucleotide reductase activase                   | <i>nrdG</i> |
| PM0563                      | phospho-2-dehydro-3-deoxyheptonate aldolase                                     | <i>aroG</i> | PM0936                                                | amino-acid acetyltransferase, N-acetylglutamate synthetase              | <i>argA</i>  | PM0951                                            | deoxycytidine triphosphate deaminase                          | <i>dcd</i>  |
| PM0577                      | tryptophan synthase alpha chain                                                 | <i>trpA</i> | PM1117                                                | gamma-glutamyl phosphate reductase                                      | <i>proA</i>  | PM1154                                            | deoxyuridine 5'-triphosphate nucleotidohydrolase              | <i>dut</i>  |
| PM0578                      | tryptophan synthase beta chain                                                  | <i>trpB</i> | PM1118                                                | acetylornithine deacetylase                                             | <i>argE</i>  | <i>Nucleotide and nucleoside interconversions</i> |                                                               |             |
| PM0580                      | indole-3-glycerol-phosphate synthase                                            | <i>trpC</i> | PM1119                                                | n-acetyl-gamma-glutamyl phosphate reductase                             | <i>argC</i>  | PM0284                                            | adenylate kinase                                              | <i>adk</i>  |
| PM0581                      | anthranilate phosphoribosyltransferase                                          | <i>trpD</i> | PM1120                                                | acetylglutamate kinase                                                  | <i>argB</i>  | PM0922                                            | guanylate kinase                                              | <i>gmk</i>  |
| PM0583                      | anthranilate synthase component II                                              | <i>trpG</i> | PM1175                                                | argininosuccinate lyase                                                 | <i>argH</i>  | PM0952                                            | uridine kinase                                                | <i>udk</i>  |
| PM0584                      | anthranilate synthase component                                                 | <i>trpE</i> | PM1189                                                | glutamine synthetase                                                    | <i>glnA</i>  | PM0981                                            | dATP pyrophosphohydrolase                                     | <i>nupA</i> |
| PM0664                      | t-protein, chorismate mutase                                                    | <i>tyrA</i> | PM1896                                                | glutamate 5-kinase                                                      | <i>proB</i>  | PM1986                                            | uridylylate kinase                                            | <i>pyrH</i> |
| PM0665                      | phospho-2-dehydro-3-deoxyheptonate aldolase                                     | <i>aroF</i> | <i>Pyruvate family</i>                                |                                                                         |              | <i>Purine ribonucleotide biosynthesis</i>         |                                                               |             |
| PM0811                      | tyrosine phenol-lyase                                                           |             | PM0566                                                | branched-chain amino acid aminotransferase                              | <i>ivlE</i>  | PM0020                                            | phosphoribosylglycinamide formyltransferase                   | <i>purN</i> |
| PM0839                      | 3-phosphoshikimate 1-carboxyvinyltransferase                                    | <i>aroA</i> | PM0869                                                | acetolactate synthase small subunit                                     | <i>ilvH</i>  | PM0021                                            | phosphoribosylaminoimidazole synthetase                       | <i>purM</i> |
| PM1093                      | 3-dehydroquininate dehydratase                                                  | <i>aroD</i> | PM0870                                                | acetolactate synthase large subunit                                     | <i>ilvI</i>  | PM0222                                            | phosphoribosylaminoimidazole ecarboxamide                     | <i>purH</i> |
| PM1223                      | 3-dehydroquininate synthetase                                                   | <i>aroB</i> | PM1284                                                | ketol-acid reductoisomerase                                             | <i>ilvC</i>  | PM0224                                            | phosphoribosylamine--glycine ligase                           | <i>purD</i> |
| PM1224                      | shikimate kinase                                                                | <i>aroK</i> | PM1625                                                | dihydroxy-acid dehydratase                                              | <i>ilvD</i>  | PM0244                                            | phosphoribosylpyrophosphate synthetase                        | <i>prsA</i> |
| PM1271                      | shikimate 5-dehydrogenase                                                       | <i>aroE</i> | PM1627                                                | acetolactate synthase small subunit                                     | <i>ilvM</i>  | PM0293                                            | GMP synthase                                                  | <i>guaA</i> |
| PM1420                      | tryptophanase                                                                   | <i>tnaA</i> | PM1628                                                | acetolactate synthase large subunit                                     | <i>ilvG</i>  | PM0295                                            | IMP (inosine 5'-monophosphate) dehydrogenase                  | <i>guaB</i> |
| PM1463                      | anthranilate synthase component II                                              | <i>trpG</i> | PM1959                                                | 3-isopropylmalate dehydratase small subunit                             | <i>leuD</i>  | PM0619                                            | phosphoribosylaminoimidazole e carboxylase, catalytic subunit | <i>purE</i> |
| <i>Aspartate family</i>     |                                                                                 |             | PM1960                                                | 3-isopropylmalate dehydratase alpha chain                               | <i>leuC</i>  | PM0620                                            | phosphoribosylaminoimidazole e carboxylase, ATPase subunit    | <i>purK</i> |
| PM0113                      | bifunctional aspartokinase/homoserine dehydrogenase I                           | <i>thrA</i> | PM1961                                                | 3-isopropylmalate dehydrogenase                                         | <i>leuB</i>  | PM0701                                            | amidophosphoribosyltransferase                                | <i>purF</i> |
| PM0114                      | homoserine kinase                                                               | <i>thrB</i> | PM1962                                                | 2-isopropylmalate synthase                                              | <i>leuA</i>  | PM0815                                            | phosphoribosylaminoimidazole e-succinocarboxamide synthase    | <i>purC</i> |
| PM0115                      | threonine synthase                                                              | <i>thrC</i> | <i>Serine family</i>                                  |                                                                         |              | PM0873                                            | formyltetrahydrofolate deformylase                            | <i>purU</i> |
| PM0235                      | 5,10-methylenetetrahydrofolate reductase                                        | <i>metF</i> | PM0225                                                | serine hydroxymethyltransferase (serine methylase)                      | <i>glyA</i>  | PM0938                                            | adenylosuccinate synthetase                                   | <i>purA</i> |
| PM0420                      | 5-methyltetrahydropteroyltri-glutamate--homocysteine aspartate aminotransferase | <i>metE</i> | PM0837                                                | phosphoserine transaminase                                              | <i>serC</i>  | PM1028                                            | nucleoside diphosphate kinase                                 | <i>ndk</i>  |
| PM0621                      | 2,3,4,5-tetrahydropyridine-2-carboxylate n-succinyltransferase                  | <i>aspC</i> | PM1430                                                | serine o-acetyltransferase                                              | <i>cysE</i>  | PM1053                                            | phosphoribosylglycinamide formyltransferase                   | <i>pur</i>  |
| PM0658                      | dihydrodipicolinate reductase                                                   | <i>dapB</i> | PM1657                                                | phosphoserine phosphatase                                               | <i>serB</i>  | PM1085                                            | phosphoribosylformylglycinamide synthase                      | <i>purL</i> |
| PM0726                      | cystathionine beta-lyase, putative                                              | <i>metC</i> | PM1671                                                | phosphoglycerate dehydrogenase                                          | <i>serA</i>  | PM1851                                            | adenylosuccinate lyase                                        | <i>purB</i> |
| PM0794                      | cystathionine beta-lyase                                                        | <i>metC</i> | PM1693                                                | cysteine synthase                                                       | <i>cysK</i>  | <i>Pyrimidine ribonucleotide biosynthesis</i>     |                                                               |             |
| PM0866                      | homoserine o-acetyltransferase, putative                                        | <i>met2</i> | PM1694                                                | cysteine synthetase, putative                                           | <i>cysZ</i>  | PM0617                                            | dihydroorotate dehydrogenase                                  | <i>pyrD</i> |
| PM0937                      | aspartokinase III, lysine sensitive                                             |             | <i>Histidine family</i>                               |                                                                         |              | PM0797                                            | orotidine 5'-phosphate decarboxylase                          | <i>pyrF</i> |
| PM0995                      | cystathionine gamma-synthase                                                    | <i>metB</i> | PM0838                                                | histidinol-phosphate transaminase                                       | <i>hisH</i>  | PM1207                                            | uracil phosphoribosyltransferase                              | <i>pyrR</i> |
| PM1022                      | succinyl-diaminopimelate desuccinylase                                          | <i>dapE</i> | PM1195                                                | atp phosphoribosyltransferase                                           | <i>hisG</i>  | PM1502                                            | carbamoyl phosphate synthetase small subunit                  | <i>carA</i> |
| PM1051                      | dihydrodipicolinate synthase                                                    | <i>dapA</i> | PM1198                                                | histidinol dehydrogenase                                                | <i>hisD</i>  | PM1505                                            | caramoylphosphate synthetase large subunit                    | <i>carB</i> |
| PM1424                      | diaminopimelate decarboxylase                                                   | <i>lysA</i> | PM1199                                                | histidinol-phosphate transaminase                                       | <i>hisH</i>  | PM1673                                            | thymidylate kinase                                            |             |
| PM1574                      | aspartate-ammonia ligase                                                        | <i>asnA</i> | PM1200                                                | imidazoleglycerol-phosphate dehydratase / histidinol-phosphatase        | <i>hisB</i>  | PM1872                                            | CTP synthetase                                                | <i>pyrG</i> |
| PM1632                      | aspartate-semialdehyde dehydrogenase                                            | <i>asd</i>  | PM1202                                                | amidotransferase                                                        | <i>hisH</i>  | PM1877                                            | orotate phosphoribosyltransferase                             | <i>pyrE</i> |
| PM1703                      | diaminopimelate epimerase                                                       | <i>dapF</i> | PM1203                                                | phosphoribosylformimino-5-aminoimidazole carboxamide ribotide isomerase | <i>hisA</i>  | <i>Salvage of nucleosides and nucleotides</i>     |                                                               |             |
| PM1822                      | serine/threonine protein kinase                                                 | <i>ppkA</i> | PM1204                                                | cyclase protein                                                         | <i>hisF</i>  | PM0019                                            | uracil phosphoribosyltransferase                              | <i>upp</i>  |
| PM1933                      | methylenetetrahydrofolate dehydrogenase (NADP+)                                 | <i>folD</i> | PM1205                                                | amidotransferase                                                        | <i>hisH</i>  | PM0121                                            | hypoxanthine phosphoribosyltransferase                        | <i>hpt</i>  |
| <i>Glutamate family</i>     |                                                                                 |             | PM1206                                                | phosphoribosyl-AMP cyclohydrolase/phosphoribosyl-ATP pyrophosphatase    | <i>hisIE</i> | PM0259                                            | cytidine deaminase                                            | <i>cdd</i>  |
| PM0043                      | glutamate dehydrogenase                                                         | <i>gdhA</i> | <b>PURINES, PYRIMIDINES, NUCLEOSIDES, NUCLEOTIDES</b> |                                                                         |              | PM0363                                            | adenine phosphoribosyltransferase                             | <i>apt</i>  |
| PM0095                      | pyrroline-5-carboxylate reductase                                               | <i>proC</i> | <i>2'-Deoxyribonucleotide metabolism</i>              |                                                                         |              | PM0802                                            | cytidylate kinase 1                                           | <i>cmkA</i> |
| PM0344                      | acetylornithine transaminase, aminotransferase                                  | <i>argD</i> | PM0079                                                | thymidylate synthetase                                                  | <i>thyA</i>  | PM1210                                            | bis (5'nucleosyl)                                             | <i>adaH</i> |
| PM0460                      | uridylyl transferase                                                            | <i>glnD</i> | PM0518                                                | glutaredoxin 2                                                          | <i>grx2</i>  |                                                   |                                                               |             |
| PM0808                      | ornithine                                                                       | <i>arcB</i> | PM0717                                                | ribonucleoside-diphosphate reductase, alpha chain                       | <i>nrdA</i>  |                                                   |                                                               |             |
|                             |                                                                                 |             | PM0719                                                | ribonucleoside diphosphate reductase, beta chain                        | <i>nrdB</i>  |                                                   |                                                               |             |
|                             |                                                                                 |             | PM0827                                                | glutaredoxin                                                            | <i>grx</i>   |                                                   |                                                               |             |

|        |                                                 |             |
|--------|-------------------------------------------------|-------------|
|        | tetraphosphatase                                |             |
| PM1236 | thymidine kinase                                | <i>tdk</i>  |
| PM1291 | purine-nucleoside phosphorylase                 | <i>deoD</i> |
| PM1369 | xanthine-guanine phosphoribosyltransferase      | <i>gpt</i>  |
| PM1572 | uridine phosphorylase                           | <i>udp</i>  |
| PM1767 | inosine-uridine preferring nucleoside hydrolase | <i>iunH</i> |
| PM2014 | 2',3'-cyclic-nucleotide 2'-phosphodiesterase    | <i>cpdB</i> |

*Sugar-nucleotide biosynthesis and conversions*

|        |                                             |             |
|--------|---------------------------------------------|-------------|
| PM0829 | mannose-6-phosphate isomerase               | <i>pmi</i>  |
| PM1193 | 5'-nucleotidase precursor                   |             |
| PM1289 | UTP-glucose-1-phosphate uridylyltransferase | <i>galU</i> |

**FATTY ACID AND PHOSPHOLIPID METABOLISM**

*Biosynthesis*

|        |                                                          |             |
|--------|----------------------------------------------------------|-------------|
| PM0048 | fatty acid metabolism regulator protein                  | <i>fadR</i> |
| PM0103 | 1-acyl-glycerol-3-phosphate acyltransferase              | <i>plsC</i> |
| PM0182 | enoyl-[acyl-carrier-protein] reductase (NADH)            | <i>fabI</i> |
| PM0292 | acetyl-CoA carboxylase                                   | <i>accA</i> |
| PM0339 | 3-oxoacyl-[acyl-carrier-protein] synthase                | <i>fabB</i> |
| PM0484 | 3-hydroxydecanoyl-[acyl-carrier-protein] dehydratase     | <i>fabA</i> |
| PM0636 | acetyl-coenzyme A carboxylase                            | <i>accD</i> |
| PM0856 | cdp-diacylglycerol--glycerol-3-phosphate                 | <i>pgsA</i> |
| PM1091 | biotin carboxylase, a subunit                            | <i>accC</i> |
| PM1092 | acetyl-CoA carboxylase, biotin carboxyl carrier protein  | <i>accB</i> |
| PM1182 | glycerol-3-phosphate o-acyltransferase                   | <i>plsB</i> |
| PM1631 | lysophospholipase L2                                     | <i>pldB</i> |
| PM1856 | cdp diacylglycerol--serine o-phosphatidyltransferase     | <i>pssA</i> |
| PM1864 | diacylglycerol kinase                                    | <i>dgkA</i> |
| PM1899 | phosphatidylserine decarboxylase                         | <i>psd</i>  |
| PM1913 | fatty acid/phospholipid synthesis protein                | <i>plsX</i> |
| PM1914 | 3-oxoacyl-[acyl-carrier-protein] synthase                | <i>fabH</i> |
| PM1915 | malonyl CoA-acyl carrier protein transacylase            | <i>fabD</i> |
| PM1916 | 3-oxoacyl-[acyl-carrier-protein] reductase               | <i>fabG</i> |
| PM1917 | acyl carrier protein                                     | <i>acpP</i> |
| PM1990 | phosphatidate cytidylyltransferase                       | <i>cdsA</i> |
| PM1995 | (3R)-hydroxymyristoyl-[acyl carrier protein] dehydratase | <i>fabZ</i> |

*Degradation*

|        |                                            |             |
|--------|--------------------------------------------|-------------|
| PM0676 | Phosphatidylglycerophosphatase B           | <i>pdpB</i> |
| PM0707 | long chain fatty acid Co-A ligase          | <i>fadD</i> |
| PM0728 | Phosphatidylglycerophosphatase A           | <i>pgpA</i> |
| PM0925 | long-chain-fatty-acid CoA ligase, putative | <i>fadD</i> |
| PM1444 | glycerophosphodiester phosphodiesterase    | <i>glpQ</i> |

*Other*

|        |                           |             |
|--------|---------------------------|-------------|
| PM0076 | outer membrane esterase   | <i>est</i>  |
| PM0355 | esterase/lipase, putative |             |
| PM0570 | acyl-CoA thioesterase II  | <i>tesB</i> |
| PM1426 | phospholipase A           |             |
| PM1451 | acetyl esterase           | <i>xynC</i> |

**BIOSYNTHESIS OF COFACTORS, PROSTHETIC GROUPS, AND CARRIERS**

*Biotin*

|        |                                                           |              |
|--------|-----------------------------------------------------------|--------------|
| PM0379 | biotin synthase                                           | <i>bioB</i>  |
| PM0641 | dethiobiotin synthase                                     | <i>bioD1</i> |
| PM1900 | adenosylmethionine--8-amino-7-oxononoate aminotransferase | <i>bioA</i>  |
| PM1901 | 8-amino-7-oxononoate synthase                             | <i>bioF</i>  |
| PM1903 | biotin synthesis protein, putative                        | <i>bioC</i>  |
| PM1904 | dethiobiotin synthase                                     | <i>bioD2</i> |

*Folic Acid*

|        |                                                           |             |
|--------|-----------------------------------------------------------|-------------|
| PM0439 | dihydropteroate synthase                                  | <i>folP</i> |
| PM0635 | folylpolyglutamate synthase                               | <i>folC</i> |
| PM0693 | GTP cyclohydrolase I                                      | <i>folE</i> |
| PM0865 | 2-amino-4-hydroxy-6-hydroxymethyl-dihydropteridine        | <i>folK</i> |
| PM1464 | para-aminobenzoate synthase component I homolog, putative | <i>pabB</i> |
| PM1697 | dihydroneopterin aldolase                                 | <i>folB</i> |
| PM1893 | dihydrofolate reductase                                   | <i>folA</i> |

*Heme, prophyrin, and cobalamin*

|        |                                                                 |             |
|--------|-----------------------------------------------------------------|-------------|
| PM0462 | glutamate-1-semialdehyde 2,1-aminomutase                        | <i>hemL</i> |
| PM0789 | ferrochelataase                                                 | <i>hemH</i> |
| PM1499 | heme biosynthesis protein                                       |             |
| PM1692 | delta-aminolevulinic acid dehydratase, porphobilinogen synthase | <i>hemB</i> |
| PM1734 | uroporphyrinogen decarboxylase, heme porphobilinogen deaminase  | <i>hemE</i> |
| PM1812 | uroporphyrinogen-III synthase, putative                         | <i>pbg</i>  |
| PM1813 | uroporphyrinogen-III synthase, putative                         | <i>hemX</i> |
| PM1833 | O <sub>2</sub> -independent coproporphyrinogen III oxidase      | <i>hemN</i> |

*Lipoate*

|        |                                                         |             |
|--------|---------------------------------------------------------|-------------|
| PM1930 | lipoic acid synthetase                                  | <i>lipA</i> |
| PM1929 | lipoate--protein ligase, lipoate biosynthesis protein B | <i>lipB</i> |

*Menaquinone and ubiquinone*

|        |                                                       |             |
|--------|-------------------------------------------------------|-------------|
| PM0053 | menaquinone-specific isochorismate synthase           | <i>menF</i> |
| PM0054 | menaquinone biosynthesis protein                      | <i>menD</i> |
| PM0346 | octylprenyl diphosphate synthase                      | <i>ispB</i> |
| PM0357 | o-succinylbenzoate--CoA ligase                        | <i>menE</i> |
| PM0533 | geranyltransferase                                    | <i>ispA</i> |
| PM0700 | 3-octaprenyl-4-hydroxybenzoate carboxylase            | <i>ubiX</i> |
| PM0840 | 3-dimethylubiquinone-9 3-methyltransferase            | <i>ubiG</i> |
| PM1094 | o-succinylbenzoate-CoA synthase                       | <i>menC</i> |
| PM1096 | naphthoate synthase                                   | <i>menB</i> |
| PM1168 | s-adenosylmethionine                                  | <i>menG</i> |
| PM1169 | 1,4-dihydroxy-2-naphthoate octaprenyltransferase      | <i>menA</i> |
| PM1686 | ubiquinone/menaquinone biosynthesis methyltransferase | <i>ubiE</i> |
| PM1688 | ubiquinone/menaquinone biosynthesis protein           | <i>aarF</i> |
| PM1725 | 2-octaprenyl-6-methoxyphenol                          |             |
| PM1751 | 4-hydroxybenzoate octaprenyltransferase               | <i>ubiA</i> |
| PM1940 | quinone reductase homolog                             |             |

*Molybdopterin*

|        |                                                 |             |
|--------|-------------------------------------------------|-------------|
| PM0622 | molybdopterin-converting factor subunit 2       | <i>moaE</i> |
| PM0623 | molybdopterin-converting factor subunit 1       | <i>moaD</i> |
| PM0624 | molybdenum cofactor biosynthesis protein C      | <i>moaC</i> |
| PM0625 | molybdenum cofactor biosynthesis protein A      | <i>moaA</i> |
| PM0694 | molybdopterin biosynthesis protein              | <i>moaE</i> |
| PM0695 | molybdopterin biosynthesis protein              | <i>moaB</i> |
| PM1785 | molybdopterin-guanine dinucleotide biosynthesis | <i>mobB</i> |
| PM1799 | molybdopterin-guanine dinucleotide biosynthesis | <i>mobA</i> |
| PM2003 | molybdopterin biosynthesis                      | <i>mog</i>  |

*Pantothenate and coenzyme A*

|        |                                               |             |
|--------|-----------------------------------------------|-------------|
| PM1153 | DNA/pantothenate metabolism flavoprotein      | <i>dpp</i>  |
| PM1747 | pantothenate kinase                           | <i>coaA</i> |
| PM0650 | riboflavin synthase alpha chain               | <i>ribE</i> |
| PM0677 | GTP cyclohydrolase II                         | <i>ribA</i> |
| PM0731 | riboflavin synthase beta chain                | <i>ribH</i> |
| PM0749 | riboflavin biosynthesis protein               | <i>ribD</i> |
| PM1385 | 3,4-dihydroxy-2-butanone 4-phosphate synthase | <i>ribB</i> |
| PM1661 | riboflavin kinase, biosynthesis               | <i>ribF</i> |

*Thiamine*

|        |                                         |             |
|--------|-----------------------------------------|-------------|
| PM0532 | 1-deoxyxylulose-5-phosphate synthase    | <i>dxs</i>  |
| PM0535 | thiamine biosynthesis protein           | <i>thiI</i> |
| PM0729 | thiamin-phosphate kinase                | <i>thiL</i> |
| PM1260 | thiamin-phosphate pyrophosphorylase     | <i>thiE</i> |
| PM1261 | phosphomethylpyrimidine kinase          | <i>thiD</i> |
| PM1262 | hydroxyethylthiazole kinase             | <i>thiM</i> |
| PM1263 | thiamine biosynthesis protein, putative |             |
| PM1334 | thiamine biosynthesis lipoprotein       | <i>apbE</i> |

*Other*

|        |                                            |            |
|--------|--------------------------------------------|------------|
| PM0185 | 6-pyruvoyl tetrahydrobiopterin synthase    |            |
| PM1988 | 1-deoxy-D-xylulose 5-phosphate reductoisom | <i>dxr</i> |
| PM1989 | undecaprenyl diphosphate synthase          |            |

**CENTRAL INTERMEDIARY METABOLISM**

*Amino Sugars*

|        |                                                                  |             |
|--------|------------------------------------------------------------------|-------------|
| PM0874 | n-acetylglucosamine-6-phosphate deacetylase                      | <i>nagA</i> |
| PM1731 | glucosamine--fructose-6-phosphate aminotransferase (isomerizing) | <i>glmS</i> |

*Phosphorus compounds*

|        |                            |            |
|--------|----------------------------|------------|
| PM1017 | acid phosphatase, putative |            |
| PM1191 | inorganic pyrophosphatase  | <i>ppa</i> |
| PM1807 | exopolyphosphatase         |            |

*Polyamine biosynthesis*

|        |                                    |             |
|--------|------------------------------------|-------------|
| PM0371 | carboxynorspermidine decarboxylase | <i>nspC</i> |
| PM0806 | ornithine decarboxylase            | <i>speF</i> |
| PM1381 | agmatinase                         | <i>speE</i> |
| PM1382 | arginine decarboxylase             | <i>speA</i> |

*Sulfur metabolism*

|        |                         |            |
|--------|-------------------------|------------|
| PM0039 | arylsulfatase precursor | <i>ars</i> |
|--------|-------------------------|------------|

|                               |                                                               |             |                                                |                                                  |              |                         |                                                                                                 |
|-------------------------------|---------------------------------------------------------------|-------------|------------------------------------------------|--------------------------------------------------|--------------|-------------------------|-------------------------------------------------------------------------------------------------|
| PM0605                        | peptide methionine sulfoxide reductase                        |             | PM1624                                         | threonine deaminase (dehydratase)                | <i>ilvA</i>  | B                       |                                                                                                 |
| PM1548                        | sulfite synthesis pathway protein                             | <i>cysQ</i> |                                                |                                                  |              | PM0733                  | NAD(P)H nitroreductase, probable NAD(P)H-flavin oxidoreductase                                  |
| <i>Nitrogen metabolism</i>    |                                                               |             | <i>Anaerobic</i>                               |                                                  |              | PM0752                  | NAD(P)+ transhydrogenase (B-specific) beta                                                      |
| PM0319                        | NiU protein, IscU protein                                     | <i>iscU</i> | PM0027                                         | cytochrome C-type biogenesis protein             | <i>nrfE</i>  | PM0753                  | NAD(P)+ transhydrogenase (B-specific) alpha                                                     |
| PM1109                        | NifC protein, putative nitrogen fixation protein              | <i>nifC</i> | PM0029                                         | cytochrome C-type biogenesis, putative (partial) | <i>nrfF</i>  | PM0973                  | cytochrome D ubiquinol oxidase, subunit II                                                      |
| PM0318                        | NifS homolog, putative iron-sulfur cofactor synthesis protein | <i>nifS</i> | PM0030                                         | cytochrome C-type biogenesis, putative (partial) | <i>nrfF</i>  | PM0974                  | cytochrome D ubiquinol oxidase, subunit I                                                       |
| PM0882                        | NifS homolog, putative iron-sulfur cofactor synthesis protein | <i>nifS</i> | PM0023                                         | nitrite reductase, cytochrome C552               | <i>nrfA</i>  | PM0994                  | thioredoxin                                                                                     |
| <i>Other</i>                  |                                                               |             | PM0024                                         | nitrite reductase, cytochrome C-type             | <i>nrfB</i>  | PM1235                  | glutathione reductase                                                                           |
| PM0052                        | aminotransferase, putative                                    |             | PM0025                                         | nitrite reductase, Fe-S protein                  | <i>nrfC</i>  | PM1329                  | NADH:ubiquinone oxidoreductase, subunit B                                                       |
| PM0071                        | beta-hexosaminidase, putative                                 |             | PM0026                                         | nitrite reductase, transmembrane protein         | <i>nrfD</i>  | PM1330                  | NADH:ubiquinone oxidoreductase, putative                                                        |
| PM0149                        | oxidoreductase, putative                                      |             | PM0198                                         | fumarate reductase, 13 kDa hydrophobic protein   | <i>frdD</i>  | PM1331                  | NADH:ubiquinone oxidoreductase, putative                                                        |
| PM0290                        | pyridoxamine kinase                                           | <i>pdxY</i> | PM0199                                         | fumarate reductase, 15kDa hydrophobic protein    | <i>frdC</i>  | PM1332                  | NADH:ubiquinone oxidoreductase                                                                  |
| PM0315                        | extragenic suppressor                                         | <i>subB</i> | PM0200                                         | fumarate reductase, iron sulfur protein          | <i>frdB</i>  | PM1592                  | ferredoxin-type protein                                                                         |
| PM0559                        | 2-hydroxyacid dehydrogenase, putative                         |             | PM0201                                         | fumarate reductase, flavoprotein subunit         | <i>frdA</i>  | PM1595                  | ferredoxin-type protein                                                                         |
| PM0685                        | hydroxyacylglutathione hydrolase, putative                    |             | PM0405                                         | FdhE homolog                                     | <i>fdhE</i>  | PM1596                  | ferredoxin-type protein                                                                         |
| PM0704                        | acetate kinase                                                | <i>ackA</i> | PM0406                                         | formate dehydrogenase, gamma subunit             | <i>fdxI</i>  | PM1598                  | cytochrome C-type protein                                                                       |
| PM0790                        | selenide, water dikinase, selenophosphate synthase            | <i>selD</i> | PM0407                                         | formate dehydrogenase, beta subunit              | <i>fdxH</i>  | PM1705                  | thioredoxin                                                                                     |
| PM0987                        | lactoylglutathione lyase                                      | <i>gloA</i> | PM0408                                         | formate dehydrogenase, alpha major subunit       | <i>fdxG</i>  | PM1792                  | pentahemic c-type cytochrome                                                                    |
| PM1027                        | S-adenosylmethionine synthetase                               | <i>metX</i> | PM0409                                         | formate dehydrogenase, alpha major subunit       | <i>fdxG</i>  | PM1793                  | trimethylamine-n-oxide reductase precursor                                                      |
| PM1100                        | ureX homolog                                                  | <i>ureX</i> | PM0410                                         | formate dehydrogenase D chain                    | <i>fdhD</i>  | PM1794                  | trimethylamine-n-oxide oxidoreductase                                                           |
| PM1300                        | hydrolase, putative                                           |             | PM1440                                         | anaerobic glycerol-3-phosphate dehydrogenase     | <i>glpC</i>  | PM1858                  | ferredoxin-like protein, putative                                                               |
| PM1383                        | oxidoreductase, putative                                      | <i>ordL</i> | PM1441                                         | glycerol-3-phosphate dehydrogenase               | <i>glpB</i>  | <i>Entner-Doudoroff</i> |                                                                                                 |
| PM1431                        | glycerol-3-phosphate dehydrogenase [NAD+]                     | <i>gspA</i> | PM1442                                         | anaerobic glycerol-3-phosphate dehydrogenase     | <i>glpA</i>  | PM0947                  | 4-hydroxy-2-oxoglutarate aldolase, 2-dehydro-3-deoxyphosphooctonate aldolase, KHG/KDPG aldolase |
| PM1436                        | GlpE homolog, glycerol metabolism                             | <i>glpE</i> | PM1754                                         | anaerobic dimethyl sulfoxide reductase, chain A  | <i>dmsA</i>  | <i>Fermentation</i>     |                                                                                                 |
| PM1438                        | Glp homolog                                                   | <i>glpG</i> | PM1755                                         | anaerobic dimethyl sulfoxide reductase, chain B  | <i>dmsB</i>  | PM0075                  | formate c-acetyltransferase                                                                     |
| PM1446                        | glycerol kinase                                               | <i>glpK</i> | PM1756                                         | anaerobic dimethyl sulfoxide reductase, chain C  | <i>dmsC</i>  | PM0077                  | pyruvate formate-lyase 1 activating enzyme                                                      |
| PM1832                        | NAD(P)H nitroreductase system, putative                       |             | <i>ATP-proton motive force interconversion</i> |                                                  |              | PM0579                  | oxidoreductase, short chain dehydrogenase/reductase, putative                                   |
| PM1905                        | carbonic anhydrase                                            |             | PM1488                                         | ATP synthase, a chain                            | <i>atpB</i>  | PM1453                  | alcohol dehydrogenase 2                                                                         |
| <b>ENERGY METABOLISM</b>      |                                                               |             | PM1489                                         | ATP synthase, c chain                            | <i>atpE</i>  | PM1968                  | sorbitol-6-phosphate dehydrogenase                                                              |
| <i>Aerobic</i>                |                                                               |             | PM1490                                         | ATP synthase, b chain                            | <i>atpF</i>  | <i>Glycolysis</i>       |                                                                                                 |
| PM1594                        | periplasmic nitrate reductase precursor                       | <i>napA</i> | PM1491                                         | ATP synthase, delta chain                        | <i>atpH</i>  | PM0069                  | 6-phosphofructokinase                                                                           |
| PM1597                        | periplasmic nitrate reductase, cytochrome c-type protein      | <i>napB</i> | PM1492                                         | ATP synthase, alpha chain                        | <i>atpA</i>  | PM0288                  | L-lactate dehydrogenase                                                                         |
| <i>Amino acids and amines</i> |                                                               |             | PM1493                                         | ATP synthase, gamma chain                        | <i>atpG</i>  | PM0416                  | glucose-6-phosphate isomerase                                                                   |
| PM0036                        | L-serine deaminase (dehydratase)                              | <i>sdaA</i> | PM1494                                         | ATP synthase, beta chain                         | <i>atpD</i>  | PM0634                  | phosphoglycerate mutase, putative                                                               |
| PM0565                        | cytosine deaminase                                            |             | PM1495                                         | ATP synthase, epsilon chain                      | <i>atpC</i>  | PM0653                  | pyruvate kinase                                                                                 |
| PM0589                        | bifunctional PutA protein, proline dehydrogenase              | <i>putA</i> | <i>Electron transport</i>                      |                                                  |              | PM0692                  | acetyl coA synthetase                                                                           |
| PM1103                        | aspartate ammonia-lyase                                       | <i>aspA</i> | PM1854                                         | iron sulfur protein, putative                    |              | PM0792                  | glucokinase, thermosensitive                                                                    |
| PM1366                        | 3-hydroxyisobutyrate dehydrogenase                            |             | PM0009                                         | cytochrome-C biosynthesis                        | <i>ccmE</i>  | PM0924                  | glyceraldehyde-3-phosphate dehydrogenase                                                        |
| PM1522                        | 4-hydroxyphenylacetic acid hydroxylase, putative              |             | PM0010                                         | cytochrome C-type biogenesis                     | <i>ccmF</i>  | PM0930                  | fructose-1,6-bisphosphatase                                                                     |
| PM1523                        | 4-hydroxyphenylacetate 3-monooxygenase                        |             | PM0012                                         | cytochrome C-type biogenesis                     | <i>ccmH</i>  | PM1311                  | triosephosphate isomerase                                                                       |
| PM1528                        | 2-hydroxyhepta-2,4-diene-1,7,-dioate isomerase                | <i>hpaG</i> | PM0013                                         | cytochrome C-type biogenesis                     | <i>ccmH</i>  | PM1373                  | fructose-1,6-bisphosphate aldolase                                                              |
| PM1529                        | 2-hydroxyhepta-2,4-diene-1,7,-dioate                          | <i>hpaG</i> | PM0323                                         | ferredoxin [2Fe-2S]                              | <i>fdx-1</i> | PM1506                  | phosphoglycerate mutase                                                                         |
| PM1530                        | 5-carboxymethyl-2-hydroxybutyrate semialdehyde dehydrogenase  | <i>hpaE</i> | PM0353                                         | flavodoxin                                       | <i>fldA</i>  | PM1542                  | phosphoenolpyruvate carboxykinase                                                               |
| PM1531                        | 3,4-dihydroxyphenylacetate 2,3-dioxygenase                    | <i>hpaD</i> | PM0386                                         | ferredoxin-like protein, putative                |              | PM1640                  | triosephosphate isomerase                                                                       |
| PM1532                        | 5-carboxymethyl-2-hydroxybutyrate isomerase                   | <i>hpaF</i> | PM0446                                         | cytochrome C-553 homolog                         |              | PM1796                  | 1-phosphofructokinase                                                                           |
| PM1534                        | 2-oxo-hept-3-ene-1,7-dioate hydratase                         | <i>hpaH</i> | PM0447                                         | cytochrome C biogenesis protein, putative        | <i>resA</i>  | PM1849                  | fructokinase                                                                                    |
| PM1535                        | 2,4-dihydroxyhept-2-ene-1,7-dioic acid aldolase               | <i>hpaI</i> | PM0573                                         | thioredoxin reductase (NADPH)                    | <i>trxB</i>  | PM1860                  | phosphoglycerate kinase                                                                         |
|                               |                                                               |             | PM0721                                         | tetrathionate reductase subunit A                | <i>ttrA</i>  | PM1861                  | fructose bisphosphate aldolase                                                                  |
|                               |                                                               |             | PM0722                                         | tetrathionate reductase subunit C                | <i>ttrC</i>  | PM1871                  | phosphopyruvate hydratase (enolase)                                                             |
|                               |                                                               |             | PM0723                                         | tetrathionate reductase subunit                  | <i>ttrB</i>  |                         |                                                                                                 |

|                                  |                                                                                  |             |                                                        |                                                                          |             |                                                   |                                                                      |             |
|----------------------------------|----------------------------------------------------------------------------------|-------------|--------------------------------------------------------|--------------------------------------------------------------------------|-------------|---------------------------------------------------|----------------------------------------------------------------------|-------------|
| <i>Pentose phosphate pathway</i> |                                                                                  |             | <i>Biosynthesis and degradation of polysaccharides</i> |                                                                          | PM1384      | spermidine/putrescine binding periplasmic protein | <i>poiD</i>                                                          |             |
| PM1242                           | transketolase                                                                    | <i>tkt</i>  | PM0540                                                 | 4-alpha-glucanotransferase                                               | <i>malQ</i> | PM1419                                            | tryptophan specific transport ptortin                                | <i>tnaB</i> |
| PM1280                           | ribulose-phosphate 3-epimerase                                                   | <i>dod</i>  | PM0541                                                 | 1,4-alpha-glucan branching enzyme                                        | <i>glgB</i> | PM1873                                            | branched-chain amino acid carrier                                    | <i>brnQ</i> |
| PM1549                           | glucose-6-phosphate 1-dehydrogenase                                              | <i>zwf</i>  | PM0542                                                 | glycogen operon protein                                                  | <i>glgX</i> | PM1906                                            | oligopeptide transport ATP-binding protein                           | <i>oppF</i> |
| PM1554                           | 6-phosphogluconate dehydrogenase                                                 | <i>gnd</i>  | PM0543                                                 | glucose-1-phosphate adenyllyltransferase                                 | <i>glgC</i> | PM1907                                            | oligopeptide transport ATP-binding protein                           | <i>oppD</i> |
| PM1602                           | transaldolase                                                                    | <i>tal</i>  | PM0544                                                 | glycogen synthase                                                        | <i>glgA</i> | PM1908                                            | oligopeptide transport permease protein                              | <i>oppC</i> |
| PM1619                           | ribulose-phosphate 3-epimerase                                                   | <i>dod</i>  | PM0545                                                 | glycogen phosphorylase                                                   | <i>glgP</i> | PM1909                                            | oligopeptide transport system permease protein                       | <i>oppB</i> |
| PM1638                           | transketolase                                                                    | <i>tkt</i>  | <i>Other</i>                                           |                                                                          |             | PM1910                                            | oligopeptide-binding protein precursor                               | <i>oppA</i> |
| PM1639                           | transaldolase                                                                    | <i>tal</i>  | PM0343                                                 | TldD homolog                                                             | <i>tldD</i> |                                                   |                                                                      |             |
| PM1645                           | ribose-5-phosphate isomerase                                                     | <i>rpiA</i> | PM0394                                                 | methylglyoxal synthase                                                   | <i>mgsA</i> |                                                   |                                                                      |             |
| PM1670                           | ribose-5-phosphate isomerase                                                     | <i>rpiA</i> | PM0887                                                 | NAD(P)H oxidoreductase, putative                                         |             |                                                   |                                                                      |             |
| <i>Pyruvate dehydrogenase</i>    |                                                                                  |             | PM1333                                                 | Na <sup>+</sup> -translocating NADH-ubiquinone oxidoreductase beta chain | <i>nqr6</i> | <i>Anions</i>                                     |                                                                      |             |
| PM0893                           | dihydrolipoamide dehydrogenase                                                   | <i>lpdA</i> | PM1343                                                 | deoxyribose-phosphate aldolase                                           | <i>deoC</i> | PM0216                                            | molybdenum-pterin-binding protein                                    | <i>mopI</i> |
| PM0894                           | dihydrolipoamide s-acetyltransferase                                             | <i>aceF</i> | PM1550                                                 | devB protein homolog                                                     | <i>devB</i> | PM0249                                            | phosphate permease, putative phosphate transport ATP-binding protein | <i>pstB</i> |
| PM0895                           | pyruvate dehydrogenase E1 component                                              | <i>aceE</i> |                                                        |                                                                          |             | PM0433                                            | phosphate transport system permease                                  | <i>pstA</i> |
| <i>Sugars</i>                    |                                                                                  |             | <b>TRANSPORT AND BINDING PROTEINS</b>                  |                                                                          |             | PM0434                                            | phosphate transport system permease protein                          | <i>pstC</i> |
| PM0152                           | ribokinase                                                                       | <i>rbsK</i> | <i>Amino acids, peptides and amines</i>                |                                                                          |             | PM0435                                            | phosphate transport system permease protein                          | <i>pstS</i> |
| PM0286                           | UDP-glucose 4-epimerase                                                          | <i>galE</i> | PM0037                                                 | serine transporter                                                       | <i>sdaC</i> | PM0436                                            | phosphate-binding periplasmic protein precursor                      | <i>modC</i> |
| PM0766                           | hexulose-6-phosphate synthase, putative                                          |             | PM0123                                                 | arginine transport protein                                               | <i>artP</i> | PM0742                                            | molybdenum transport ATP-binding protein                             | <i>modB</i> |
| PM0875                           | glucosamine-6-phosphate isomerase                                                | <i>nagB</i> | PM0124                                                 | arginine binding protein                                                 | <i>artI</i> | PM0743                                            | molybdenum transport system permease protein                         | <i>modA</i> |
| PM1034                           | aldose 1-epimerase                                                               | <i>galM</i> | PM0125                                                 | arginine transport system permease protein                               | <i>artQ</i> | PM0744                                            | molybdate-binding periplasmic protein                                | <i>modE</i> |
| PM1035                           | galactokinase                                                                    | <i>galK</i> | PM0126                                                 | arginine transport system permease protein                               | <i>artM</i> | PM0746                                            | molybdenum transport protein                                         | <i>modF</i> |
| PM1036                           | galactose-1-phosphate uridylyltransferase                                        | <i>galT</i> | PM0162                                                 | arginine/ornithine antiporter, putative                                  | <i>arcD</i> | PM0890                                            | molybdenum transport protein, putative                               | <i>modB</i> |
| PM1062                           | d-mannitol-1-phosphate dehydrogenase                                             | <i>mtlD</i> | PM0236                                                 | dipeptide transport protein, periplasmic                                 | <i>dppA</i> | PM1108                                            | molybdenum transport protein                                         | <i>modD</i> |
| PM1244                           | L-ribulose-phosphate 4-epimerase                                                 | <i>araD</i> | PM0237                                                 | dipeptide transport system permease protein                              | <i>dppB</i> | PM1111                                            | molybdenum transport system protein                                  |             |
| PM1245                           | hexulose-6-phosphate isomerase, putative                                         |             | PM0238                                                 | dipeptide transport system permease protein                              | <i>dppC</i> | <i>Cations</i>                                    |                                                                      |             |
| PM1246                           | hexulose-6-phosphate synthase, putative                                          |             | PM0239                                                 | dipeptide transport ATP-binding protein                                  | <i>dppD</i> | PM0005                                            | heme exporter ATP-binding protein A                                  | <i>ccmA</i> |
| PM1247                           | xylulose kinase                                                                  | <i>lyx</i>  | PM0240                                                 | dipeptide transport ATP-binding protein                                  | <i>dppF</i> | PM0006                                            | heme exporter ATP-binding protein B                                  | <i>ccmB</i> |
| PM1248                           | gluconolactonase precursor, putative                                             |             | PM0260                                                 | spermidine/putrescine ABC transporter, periplasmic-binding protein       | <i>poiD</i> | PM0007                                            | heme exporter ATP-binding protein C                                  | <i>ccmC</i> |
| PM1272                           | sugar kinase (xylulose), putative                                                |             | PM0261                                                 | spermidine/putrescine ABC transporter, periplasmic-binding protein       | <i>poiD</i> | PM0008                                            | heme exporter ATP-binding protein D                                  | <i>ccmD</i> |
| PM1371                           | xylulose kinase                                                                  |             | PM0262                                                 | spermidine/putrescine transport system permease protein                  | <i>poiC</i> | PM0040                                            | outer membrane heme receptor                                         | <i>pfhR</i> |
| PM1372                           | sugar kinase, putative                                                           |             | PM0263                                                 | spermidine/putrescine ABC transporter, permease protein                  | <i>poiB</i> | PM0047                                            | Na <sup>+</sup> /H <sup>+</sup> antiporter                           | <i>nhaB</i> |
| PM1620                           | phosphoglycolate phosphatase                                                     | <i>gph</i>  | PM0264                                                 | spermidine/putrescine ABC transporter, ATP-binding protein               | <i>poiA</i> | PM0049                                            | ATPase, ABC type transport protein                                   | <i>fbpC</i> |
| PM1710                           | acylneuraminatase                                                                |             | PM0335                                                 | proton glutamate symport protein, putative                               |             | PM0050                                            | transmembrane permease, putative                                     | <i>fbpB</i> |
| PM1712                           | cytidyltransferase                                                               |             | PM0564                                                 | cytosine permease/transport protein                                      | <i>codB</i> | PM0051                                            | iron binding protein FbpA precursor                                  | <i>fbpA</i> |
| PM1715                           | glucose kinase, putative                                                         |             | PM0678                                                 | oligopeptide-binding protein homolog, periplasmic, putative              |             | PM0128                                            | membrane-bound iron(III) dicitrate transport protein                 | <i>fecE</i> |
| PM1715                           | N-acetylneuraminatase lyase, putative                                            | <i>nanA</i> | PM0732                                                 | tyrosine-specific transport protein 1                                    | <i>tyrP</i> | PM0129                                            | iron (III) dicitrate transport system permease                       | <i>fecD</i> |
| PM1848                           | sucrose-6-phosphate hydrolase, sucrase                                           | <i>scrB</i> | PM0807                                                 | putrescine-ornithine antiporter                                          | <i>potE</i> | PM0130                                            | iron (III) dicitrate transport system permease                       | <i>fecC</i> |
| <i>TCA cycle</i>                 |                                                                                  |             | PM0810                                                 | tyrosine-specific transport protein 1                                    | <i>tyrP</i> | PM0131                                            | iron (III) dicitrate-binding periplasmic protein                     | <i>fecB</i> |
| PM0002                           | malate dehydrogenase                                                             | <i>mdh</i>  | PM0911                                                 | peptide ABC transporter, periplasmic-binding protein                     | <i>sapA</i> | PM0241                                            | high affinity zinc uptake system membrane protein                    | <i>yebM</i> |
| PM0204                           | aconitate hydratase 2                                                            | <i>acnB</i> | PM0912                                                 | peptide ABC transporter, permease protein                                | <i>sapB</i> | PM0242                                            | high affinity zinc uptake system, ATP binding protein                |             |
| PM0276                           | citrate synthase                                                                 | <i>glfA</i> | PM0913                                                 | peptide ABC transporter, permease protein                                | <i>sapC</i> | PM0300                                            | TonB-dependent receptor, putative                                    |             |
| PM0277                           | 2-oxoglutarate dehydrogenase, E1 component                                       | <i>sucA</i> | PM0914                                                 | peptide ABC transporter, ATP-binding protein                             | <i>sapD</i> | PM0336                                            | TonB-dependent receptor, putative                                    |             |
| PM0278                           | 2-oxoglutarate dehydrogenase, E2 component, dihydrolipoamide succinyltransferase | <i>sucB</i> | PM0915                                                 | peptide ABC transporter, ATP-binding protein                             | <i>sapF</i> | PM0337                                            | hemoglobin/haptoglobin binding protein                               |             |
| PM0280                           | succinate-coa ligase (ADP-forming) beta                                          | <i>sucC</i> | PM1192                                                 | tryptophan-specific transport protein                                    | <i>mtr</i>  | PM0341                                            | sodium/proline symporter                                             | <i>putP</i> |
| PM0281                           | succinate-coa ligase (ADP-forming) alpha                                         | <i>sucD</i> |                                                        |                                                                          |             | PM0365                                            | Na <sup>+</sup> /H <sup>+</sup> antiporter, putative                 | <i>nhaP</i> |
| PM0546                           | phosphoenolpyruvate carboxylase                                                  | <i>ppc</i>  |                                                        |                                                                          |             | PM0397                                            | iron (chelated) transporter, permease protein                        | <i>yfeD</i> |
| PM0550                           | malate dehydrogenase, putative                                                   | <i>mdh</i>  |                                                        |                                                                          |             |                                                   |                                                                      |             |
| PM0823                           | fumarate hydratase class II                                                      | <i>fumC</i> |                                                        |                                                                          |             |                                                   |                                                                      |             |
| PM1606                           | isocitrate dehydrogenase                                                         | <i>idp</i>  |                                                        |                                                                          |             |                                                   |                                                                      |             |

|        |                                                                                                          |              |        |                                                                                               |             |        |                                                                              |             |
|--------|----------------------------------------------------------------------------------------------------------|--------------|--------|-----------------------------------------------------------------------------------------------|-------------|--------|------------------------------------------------------------------------------|-------------|
| PM0398 | iron (chelated) ABC transporter, permease protein, putative                                              | <i>yfeC</i>  | PM0275 | C4-dicarboxylate-binding periplasmic protein                                                  |             | PM1653 | large integral C4-dicarboxylate membrane transport protein, putative         |             |
| PM0399 | iron (III) dicitrate transport ATP-binding protein, iron (chelated) transporter                          | <i>yfeB</i>  | PM0765 | unknown pentitol PTS enzyme, putative                                                         |             | PM1740 | gluconate transport protein homolog                                          | <i>gntP</i> |
| PM0400 | Mn transport protein ABC transporter, iron (chelated) transporter, periplasmic-binding protein, putative | <i>yfeA</i>  | PM0793 | gluconate permease                                                                            | <i>gntP</i> | PM1752 | phosphotransferase system enzyme II, glucose-specific                        | <i>ptsG</i> |
| PM0576 | heme-hemopexin utilization protein C                                                                     | <i>hemR</i>  | PM0832 | phosphotransferase system enzyme II, mannose-specific, factor IID                             | <i>ptmD</i> | PM1763 | maltose transport ATP-binding protein                                        |             |
| PM0588 | sodium/proline symporter                                                                                 | <i>putP</i>  | PM0833 | phosphotransferase system enzyme II, mannose-specific, factor IIC                             | <i>ptmC</i> | PM1795 | phosphotransferase system enzyme II, fructose-specific                       | <i>fruA</i> |
| PM0592 | heme-binding protein A precursor                                                                         | <i>hbpA</i>  | PM0834 | phosphotransferase system enzyme II, mannose-specific, factor IIAB                            |             | PM1797 | phosphotransferase system enzyme II, fructose-specific, IIA/FPR component    | <i>fruB</i> |
| PM0666 | ferritin like protein 1                                                                                  | <i>rsgA1</i> | PM0876 | phosphotransferase system permease for N-acetylglucosamine and glucose                        |             | PM1846 | phosphotransferase system enzyme II, sucrose-specific, factor IIBC           | <i>ptsB</i> |
| PM0667 | ferritin like protein 2                                                                                  | <i>rsgA2</i> | PM0896 | phosphotransferase system enzyme II, glucose-specific factor III                              | <i>crr</i>  | PM1852 | L-lactate permease                                                           | <i>lctP</i> |
| PM0741 | hemoglobin receptor precursor                                                                            |              | PM0897 | phosphoenolpyruvate-protein phosphotransferase                                                | <i>ptsI</i> | PM1918 | C4-dicarboxylate membrane transporter                                        |             |
| PM0745 | outer membrane heme receptor, hypothetical                                                               |              | PM0898 | phosphocarrier protein hpr                                                                    | <i>ptsH</i> | PM1969 | phosphotransferase system enzyme III, glucitol                               |             |
| PM0953 | AfuA protein, putative                                                                                   | <i>afuA</i>  | PM1038 | D-galactose binding periplasmic protein precursor                                             | <i>mglB</i> | PM1970 | phosphotransferase system enzyme II, glucitol/sorbitol-specific, factor IIBC |             |
| PM0954 | AfuA protein, putative                                                                                   | <i>afuA</i>  | PM1039 | galactoside transport ATP-binding protein                                                     | <i>mglA</i> | PM1971 | phosphotransferase system enzyme II, glucitol/sorbitol-specific, factor IIB  |             |
| PM0955 | AfuA protein, putative                                                                                   | <i>afuA</i>  | PM1040 | galactoside ABC transporter, permease protein                                                 | <i>mglC</i> |        | <i>Nucleosides, purines, and pyrimidines</i>                                 |             |
| PM0956 | AfuB protein, putative                                                                                   | <i>afuB</i>  | PM1061 | phosphotransferase system mannitol-specific enzyme IIBC component                             | <i>ptmA</i> | PM0018 | uracil permease, putative                                                    | <i>uraA</i> |
| PM0957 | ferric transport protein                                                                                 | <i>afuC</i>  | PM1250 | ribose transport system permease                                                              | <i>rbsC</i> |        | <i>Other</i>                                                                 |             |
| PM1052 | bacterioferritin comigratory protein                                                                     | <i>bcp</i>   | PM1251 | ribose transport ATP-binding protein                                                          | <i>rbsA</i> | PM0158 | alkylphosphonate uptake protein                                              | <i>phnA</i> |
| PM1078 | hemin binding receptor                                                                                   |              | PM1274 | ABC transporter ATP binding protein, probable ribose sugar transport ATP-binding protein      |             | PM0331 | outer membrane protein ompW precursor                                        | <i>ompW</i> |
| PM1079 | FecCD-family membrane transport                                                                          |              | PM1275 | ABC transporter ATP binding protein, probable L-arabinase sugar transport ATP-binding protein |             | PM0376 | thiamin-binding periplasmic protein precursor                                | <i>tbpA</i> |
| PM1147 | iron chelatin ABC transporter, putative                                                                  |              | PM1276 | ABC transporter ATP binding protein, probable ribose sugar transport ATP-binding protein      |             | PM0377 | thiamin ABC transporter, permease protein, putative                          |             |
| PM1148 | iron chelatin ABC transporter, putative                                                                  |              | PM1277 | sugar binding protein, putative                                                               |             | PM0378 | thiamin ABC transporter, ATP-binding protein, putative                       |             |
| PM1149 | iron chelatin ABC transporter, putative                                                                  |              | PM1324 | D-allose binding periplasmic protein                                                          |             | PM1089 | sodium/pantothenate symporter                                                | <i>panF</i> |
| PM1186 | biopolymer transport protein homolog                                                                     | <i>exbB</i>  | PM1325 | D-allose binding periplasmic protein                                                          |             | PM1104 | efflux pump component, putative                                              | <i>mtrF</i> |
| PM1187 | biopolymer transport protein                                                                             | <i>exbD</i>  | PM1326 | ribose ABC transporter, ATP-binding protein                                                   |             | PM1155 | transferrin binding protein, putative                                        |             |
| PM1188 | TonB protein                                                                                             | <i>tonB</i>  | PM1327 | ribose transport system permease protein                                                      | <i>rbsC</i> | PM1421 | oxaloacetate decarboxylase gamma chain, sodium ion pump                      |             |
| PM1212 | mercuric ion transport protein, putative                                                                 | <i>merT</i>  | PM1341 | hexosephosphate transport protein                                                             | <i>uhpT</i> | PM1422 | oxaloacetate decarboxylase alpha chain, sodium ion pump                      |             |
| PM1213 | mercuric reductase homolog, mercuric ion scavenger                                                       | <i>merP</i>  | PM1359 | gluconate transport protein homolog                                                           | <i>gntP</i> | PM1423 | oxaloacetate decarboxylase beta chain, sodium ion pump                       |             |
| PM1265 | ABC transporter, permease protein, nitrate transport                                                     |              | PM1377 | D-ribose binding periplasmic protein precursor                                                | <i>rbsB</i> | PM1455 | AfuB homolog                                                                 | <i>afuB</i> |
| PM1308 | ABC transporter, hemin permease homolog, putative                                                        | <i>hemU</i>  | PM1378 | ribose ABC transporter, permease protein                                                      |             |        | <i>Unknown substrate</i>                                                     |             |
| PM1309 | ferric enterobactin transport ATP-binding protein, hypothetical ABC transporter                          |              | PM1379 | ribose ABC transporter, ATP-binding protein                                                   |             | PM0041 | hypothetical ABC transporter, ATP binding protein I                          |             |
| PM1315 | magnesium and cobalt transport protein                                                                   | <i>corA</i>  | PM1434 | anaerobic dicarboxylate transport protein homolog                                             | <i>dcuB</i> | PM0094 | 3-phenylpropionic acid transporter, putative                                 |             |
| PM1337 | cation-efflux system membrane protein                                                                    | <i>czcD</i>  | PM1443 | glycerol-3-phosphate transporter                                                              | <i>glpT</i> | PM0170 | nitrogen regulatory IIA protein                                              | <i>ptsN</i> |
| PM1457 | periplasmic iron-binding protein, putative                                                               |              | PM1445 | glycerol uptake facilitator protein                                                           | <i>glpF</i> | PM0171 | ABC transporter, ATP binding protein, putative                               |             |
| PM1498 | TRK system potassium uptake protein                                                                      | <i>trkH</i>  | PM1454 | multiple sugar-binding transport ATP binding protein                                          | <i>msmK</i> | PM0174 | ABC transporter, ATP-binding protein, putative                               |             |
| PM1563 | TRK system potassium uptake protein                                                                      | <i>trkA</i>  | PM1458 | phosphoglycerate transport regulatory protein                                                 | <i>pgtC</i> | PM0273 | large integral membrane protein, transport protein, putative                 |             |
| PM1622 | heme receptor                                                                                            | <i>hasR</i>  | PM1459 | phosphoglycerate transport regulatory protein                                                 | <i>pgtC</i> | PM0274 | small integral membrane protein, transport protein, putative                 |             |
| PM1684 | Na <sup>+</sup> /H <sup>+</sup> antiporter                                                               | <i>nhaA</i>  | PM1525 | C4-dicarboxylate periplasmic binding protein, putative                                        | <i>dctP</i> | PM0380 | sodium-dependent transporter, putative                                       |             |
| PM1891 | mercuric ion-binding protein, putative                                                                   |              | PM1527 | large integral C4-dicarboxylate membrane transport protein, putative                          |             | PM0388 | outer membrane protein                                                       | <i>ompH</i> |
| PM1892 | cation-transport ATPase, potassium/copper-transporting ATPase, putative                                  |              |        |                                                                                               |             | PM0389 | outer membrane protein                                                       | <i>ompH</i> |
|        | <i>Carbohydrates, organic alcohols, and acids</i>                                                        |              |        |                                                                                               |             | PM0425 | ABC transporter, ATP-binding protein                                         |             |
| PM0074 | formate transporter, putative                                                                            |              |        |                                                                                               |             | PM0450 | hypothetical ABC transporter                                                 |             |
| PM0153 | D-ribose-binding periplasmic protein precursor                                                           | <i>rbsB</i>  |        |                                                                                               |             |        |                                                                              |             |
| PM0154 | ribose transport system permease protein                                                                 | <i>rbsC</i>  |        |                                                                                               |             |        |                                                                              |             |
| PM0155 | ribose transport ATP-binding protein                                                                     | <i>rbsA</i>  |        |                                                                                               |             |        |                                                                              |             |
| PM0156 | high affinity ribose transport protein                                                                   | <i>rbsD</i>  |        |                                                                                               |             |        |                                                                              |             |
| PM0230 | C4-dicarboxylate anaerobic carrier                                                                       | <i>dcuC</i>  |        |                                                                                               |             |        |                                                                              |             |

|                                                   |                                                    |             |        |                                                               |             |                                       |                                                                         |             |
|---------------------------------------------------|----------------------------------------------------|-------------|--------|---------------------------------------------------------------|-------------|---------------------------------------|-------------------------------------------------------------------------|-------------|
| PM0470                                            | ABC-type transport protein, putative               | <i>yagD</i> | PM0206 | recombination protein                                         | <i>recR</i> | PM1486                                | glucose inhibited division protein B                                    | <i>gidB</i> |
| PM0538                                            | outer membrane protein, putative                   |             | PM0207 | DNA topoisomerase III                                         | <i>topB</i> | PM1561                                | Sun protein                                                             | <i>sun</i>  |
| PM0561                                            | ABC transporter, ATP-binding protein, putative     |             | PM0332 | DNA repair protein                                            | <i>recN</i> | PM1601                                | DNA-3-methyladenine glycosidase I                                       | <i>tagI</i> |
| PM0571                                            | ATP-binding transport protein, putative            | <i>cycC</i> | PM0356 | SeqA protein homolog                                          | <i>seqA</i> | PM1674                                | DNA polymerase III, delta' subunit                                      | <i>holB</i> |
| PM0572                                            | ATP-binding transport protein, putative            | <i>cycD</i> | PM0364 | DNA polymerase III, subunits gamma and tau                    | <i>dnaX</i> | PM1701                                | integrase/recombinase                                                   | <i>xerC</i> |
| PM0718                                            | sodium-dependent transporter, putative             |             | PM0369 | topoisomerase IV subunit A                                    | <i>parC</i> | PM1716                                | DNA ligase                                                              | <i>lig</i>  |
| PM0764                                            | transport protein, putative                        |             | PM0370 | topoisomerase IV subunit B                                    | <i>parE</i> | PM1750                                | DNA alkylation repair enzyme                                            |             |
| PM0786                                            | outer membrane protein                             |             | PM0381 | endonuclease III                                              | <i>nth</i>  | PM1817                                | RecA protein                                                            | <i>recA</i> |
| PM0830                                            | outer membrane protein, putative                   |             | PM0411 | DNA helicase II                                               | <i>uvrD</i> | PM1830                                | DNA mismatch repair protein                                             | <i>mutS</i> |
| PM0831                                            | outer membrane protein                             | <i>ompH</i> | PM0412 | replicative DNA helicase                                      | <i>dnaB</i> | PM1867                                | DNA repair protein                                                      | <i>recO</i> |
| PM0843                                            | TadG, nonspecific tight adherence protein          | <i>tadG</i> | PM0429 | excinuclease ABC subunit B                                    | <i>uvrB</i> | PM1950                                | single-stranded DNA-binding protein                                     | <i>ssb</i>  |
| PM0844                                            | TadF, nonspecific tight adherence protein          | <i>tadF</i> | PM0445 | pyrimidine dimer-specific glycosylase                         |             | PM1951                                | excinuclease ABC subunit A                                              | <i>uvrA</i> |
| PM0845                                            | TadE, nonspecific tight adherence protein          | <i>tadE</i> | PM0467 | DNA damage inducible protein P                                | <i>dinP</i> |                                       |                                                                         |             |
| PM0846                                            | TadD, nonspecific tight adherence protein          | <i>tadD</i> | PM0516 | exodeoxyribonuclease V, beta chain                            | <i>recB</i> | <i>Restriction/modification</i>       |                                                                         |             |
| PM0847                                            | TadC, nonspecific tight adherence protein          | <i>tadC</i> | PM0517 | exodeoxyribonuclease V, alpha chain                           | <i>recD</i> | PM0390                                | adenine specific methylase, putative                                    | <i>dam</i>  |
| PM0848                                            | TadB, nonspecific tight adherence protein          | <i>tadB</i> | PM0615 | DNA topoisomerase I                                           | <i>topA</i> | PM0698                                | methyltransferase, type III DNA modification enzyme                     |             |
| PM0849                                            | TadA, nonspecific tight adherence protein          | <i>tadA</i> | PM0628 | integration host factor, alpha-subunit                        | <i>himA</i> | PM0699                                | type III restriction enzyme, restriction endonuclease                   |             |
| PM0861                                            | ABC-type transport protein                         | <i>msbA</i> | PM0691 | exodeoxyribonuclease III                                      |             | PM1041                                | transcription-repair coupling factor                                    | <i>mfd</i>  |
| PM0877                                            | ABC transporter, ATP-binding protein               | <i>uupI</i> | PM0710 | ATP-dependent helicase, putative                              | <i>dnt</i>  | PM1537                                | site-specific DNA-methyltransferase, type I modification                | <i>hsdM</i> |
| PM0966                                            | outer membrane protein                             |             | PM0800 | integration host factor, beta-subunit                         | <i>himD</i> | PM1538                                | type I site-specific deoxyribonuclease, putative                        | <i>hsdA</i> |
| PM0996                                            | ABC transporter, ATP-binding subunit homolog       |             | PM0822 | DNA polymerase III, chi subunit                               | <i>holC</i> | PM1541                                | type I site-specific deoxyribonuclease/modification                     | <i>hsdR</i> |
| PM1069                                            | outer membrane protein P1 precursor                |             | PM0841 | DNA gyrase subunit A                                          | <i>gyrA</i> | PM1750                                | DNA alkylation repair enzyme                                            |             |
| PM1072                                            | ABC transporter, ATP-binding protein, putative     |             | PM0857 | excinuclease ABC subunit C                                    | <i>uvrC</i> |                                       |                                                                         |             |
| PM1110                                            | ABC transporter, ATP-binding protein, putative     |             | PM0863 | DnaK suppressor protein                                       | <i>dksA</i> | <i>Degradation of DNA</i>             |                                                                         |             |
| PM1131                                            | permease, putative                                 | <i>perM</i> | PM0892 | ImpA protein, putative                                        | <i>impA</i> | PM0168                                | exodeoxyribonuclease VII, large subunit                                 | <i>xseA</i> |
| PM1266                                            | ABC transporter, ATP-binding protein, nasD homolog |             | PM0904 | DNA mismatch repair protein                                   | <i>mutL</i> | PM0192                                | single-stranded-DNA-specific exonuclease                                | <i>recJ</i> |
| PM1301                                            | ABC transporter, ATP-binding protein, putative     |             | PM0919 | ATP-dependent DNA helicase                                    | <i>recG</i> | PM0534                                | exodeoxyribonuclease VII small subunit                                  | <i>xseB</i> |
| PM1328                                            | 48 kDa outer membrane protein                      |             | PM0959 | DNA polymerase III, psi subunit                               | <i>hold</i> | PM0611                                | exonuclease I                                                           | <i>sbcB</i> |
| PM1456                                            | ATP-binding transport protein, putative            |             | PM0961 | exodeoxyribonuclease V, gamma chain                           | <i>recC</i> | <i>Chromosome-associated proteins</i> |                                                                         |             |
| PM1473                                            | ABC transporter, ATP-binding protein, putative     |             | PM0976 | Holliday junction DNA helicase                                | <i>ruvB</i> | PM0872                                | VicH, DNA-binding protein H-NS homolog                                  | <i>hns</i>  |
| PM1474                                            | transport ATP binding protein                      | <i>cydD</i> | PM0977 | Holliday junction DNA helicase                                | <i>ruvA</i> | PM1732                                | DNA-binding protein HU-2 alpha                                          | <i>hupA</i> |
| PM1564                                            | large conductance mechanosensitive channel         | <i>mscL</i> | PM0978 | crossover junction endodeoxyribonuclease                      | <i>ruvC</i> | <b>TRANSCRIPTION</b>                  |                                                                         |             |
| PM1582                                            | ABC transporter, ATP-binding protein, putative     |             | PM1059 | ATP-dependent DNA helicase                                    | <i>rep</i>  | <i>Degradation of RNA</i>             |                                                                         |             |
| PM1728                                            | ATP-binding protein, ABC transporter               |             | PM1065 | DNA polymerase I                                              | <i>polA</i> | PM0181                                | exoribonuclease II                                                      | <i>rnb</i>  |
| PM1729                                            | ABC transporter permease protein, putative         |             | PM1067 | DNA mismatch repair protein                                   | <i>mutH</i> | PM1114                                | polynucleotide phosphorylase, polyribonucleotide nucleotidyltransferase | <i>pnp</i>  |
| PM1791                                            | transport protein homolog                          |             | PM1068 | methylated-DNA--protein-cysteine methyltransferase            | <i>datI</i> | PM1921                                | ATP-dependent RNA helicase                                              | <i>rhB</i>  |
| PM1982                                            | ABC transporter, ATP-binding protein, putative     |             | PM1086 | factor for inversion stimulation protein, DNA-binding protein | <i>fis</i>  | PM1998                                | Ribonuclease HIII                                                       | <i>rnhB</i> |
| PM1992                                            | outer membrane antigen OMA87                       |             | PM1137 | primosomal protein N'                                         | <i>priA</i> | <i>DNA-dependent RNA polymerase</i>   |                                                                         |             |
| PM2000                                            | outer membrane protein, putative                   |             | PM1145 | formamidopyrimidine-DNA glycosylase                           | <i>fpg</i>  | PM0921                                | DNA-directed RNA polymerase, omega chain                                | <i>rpoZ</i> |
|                                                   |                                                    |             | PM1152 | DNA repair protein                                            | <i>radC</i> | PM1390                                | DNA-directed RNA polymerase, alpha chain                                | <i>rpoA</i> |
| <b>DNA METABOLISM</b>                             |                                                    |             | PM1159 | DNA/ATP binding protein RecF                                  | <i>recF</i> | PM1736                                | DNA-directed RNA polymerase, beta' chain                                | <i>rpoC</i> |
| <i>DNA replication, recombination, and repair</i> |                                                    |             | PM1160 | DNA polymerase III, beta subunit                              | <i>dnaN</i> | PM1737                                | DNA-directed RNA polymerase, beta chain                                 | <i>rpoB</i> |
| PM0034                                            | DNA polymerase III, alpha subunit                  | <i>dnaE</i> | PM1161 | chromosomal replication initiator protein                     | <i>dnaA</i> | PM1837                                | ATP-dependent helicase, RNA polymerase associated protein               | <i>hepA</i> |
| PM0065                                            | uracil DNA glycosylase                             | <i>ung</i>  | PM1179 | primosomal replication protein N                              | <i>priB</i> | <i>Transcription factors</i>          |                                                                         |             |
| PM0093                                            | integrase/recombinase                              | <i>xerD</i> | PM1216 | DNA polymerase III, delta subunit                             | <i>holA</i> | PM0092                                | sigma (54) modulation protein, putative                                 |             |
| PM0106                                            | DNA polymerase III, epsilon subunit                | <i>dnaQ</i> | PM1218 | mutator MutT protein                                          | <i>mutT</i> | PM0209                                | sigma factor, putative                                                  |             |
| PM0107                                            | ribonuclease H                                     | <i>rnh</i>  | PM1222 | DNA adenine methylase                                         | <i>dam</i>  | PM0715                                | transcription elongation factor                                         | <i>greA</i> |
|                                                   |                                                    |             | PM1240 | DNA primase                                                   | <i>dnaG</i> | PM0730                                | N utilization substance protein                                         | <i>nusB</i> |
|                                                   |                                                    |             | PM1319 | A/G-specific adenine glycosylase                              | <i>mutY</i> |                                       |                                                                         |             |
|                                                   |                                                    |             | PM1427 | ATP-dependent DNA helicase                                    | <i>recQ</i> |                                       |                                                                         |             |
|                                                   |                                                    |             | PM1468 | site-specific recombinase                                     |             |                                       |                                                                         |             |
|                                                   |                                                    |             | PM1476 | DNA gyrase subunit B                                          | <i>gyrB</i> |                                       |                                                                         |             |
|                                                   |                                                    |             | PM1485 | glucose inhibited division protein A                          | <i>gidA</i> |                                       |                                                                         |             |

|                            |                                                                          |             |                                                       |                                                                                      |              |                                                      |                                                                                         |             |
|----------------------------|--------------------------------------------------------------------------|-------------|-------------------------------------------------------|--------------------------------------------------------------------------------------|--------------|------------------------------------------------------|-----------------------------------------------------------------------------------------|-------------|
| PM0760                     | N utilization substance protein A, transcription anti-termination factor | <i>nusA</i> | PM1662                                                | isoleucine--tRNA ligase, isoleucyl-tRNA synthetase                                   | <i>ileS</i>  | PM0229                                               | putative queuine tRNA-ribosyltransferase                                                | <i>tgt</i>  |
| PM1241                     | RNA polymerase sigma-70-subunit                                          | <i>rpoD</i> | PM1768                                                | seryl-tRNA(Ser) selenium transferase                                                 | <i>sela</i>  | PM0232                                               | S-adenosylmethionine, tRNA ribosyltransferase-isomerase, queuosine biosynthesis protein | <i>queA</i> |
| PM1450                     | transcription elongation factor                                          | <i>greB</i> | PM2011                                                | histidyl-tRNA ligase, histidine-tRNA synthetase                                      | <i>hisS</i>  | PM0637                                               | tRNA-pseudouridine synthase 1                                                           | <i>truA</i> |
| PM1584                     | RNA polymerase sigma-32 factor                                           | <i>rpoH</i> | <i>Ribosomal proteins: synthesis and modification</i> |                                                                                      |              | PM0756                                               | tRNA pseudouridine 55 synthase                                                          | <i>truB</i> |
| PM1744                     | transcription anti-termination protein                                   | <i>nusG</i> | PM0960                                                | peptide N-acetyltransferase, ribosomal protein alanine acetyltransferase             | <i>rimI</i>  | PM0905                                               | tRNA delta(2)-isopentenylpyrophosphate transferase                                      | <i>trpX</i> |
| PM1789                     | RNA polymerase sigma-E factor                                            | <i>rpoE</i> | PM0220                                                | probable ribosomal protein L31                                                       | <i>rpL31</i> | PM0992                                               | ribosomal large subunit pseudouridine synthase C                                        | <i>rluC</i> |
| PM1920                     | transcription termination factor                                         | <i>rho</i>  | PM0301                                                | ribosomal protein S15                                                                | <i>rpS15</i> | PM1209                                               | dimethyladenosine transferase                                                           | <i>ksgA</i> |
| <i>RNA processing</i>      |                                                                          |             | PM0347                                                | ribosomal protein L21                                                                | <i>rpL21</i> | PM1296                                               | 16S rRNA processing protein, putative                                                   | <i>rimM</i> |
| PM0061                     | ribonuclease III                                                         | <i>rnc</i>  | PM0348                                                | ribosomal protein L27                                                                | <i>rpL27</i> | PM1297                                               | tRNA (guanine-N1)-methyltransferase                                                     | <i>trmD</i> |
| PM0247                     | tRNA nucleotidyltransferase                                              | <i>cca</i>  | PM0520                                                | ribosomal protein L13                                                                | <i>rpL13</i> | PM1336                                               | tRNA 5-methylaminomethyl-2-thiouridylate, putative rRNA methylase, putative             | <i>rbn</i>  |
| PM0706                     | ribonuclease D                                                           | <i>rnd</i>  | PM0521                                                | ribosomal protein S9                                                                 | <i>rpS9</i>  | PM1513                                               | ribonuclease BN                                                                         | <i>rbn</i>  |
| PM0757                     | ribosome binding factor A                                                | <i>rbfA</i> | PM0603                                                | ribosomal protein L35                                                                | <i>rpL35</i> | PM1616                                               | ribosomal small subunit pseudouridine                                                   | <i>sfB</i>  |
| PM0864                     | poly(A) polymerase                                                       | <i>pcnB</i> | PM0604                                                | ribosomal protein L20                                                                | <i>rpL20</i> | PM1719                                               | tRNA (uracil-5-)-methyltransferase                                                      | <i>trmA</i> |
| PM0988                     | ribonuclease T                                                           | <i>rnt</i>  | PM0639                                                | ribosomal protein L25                                                                | <i>rpL25</i> | PM1803                                               | ribosomal large subunit pseudouridine synthase A                                        | <i>rsuA</i> |
| PM0991                     | ribonuclease E                                                           | <i>rne</i>  | PM0801                                                | ribosomal protein S1                                                                 | <i>rpS1</i>  | PM1836                                               | rRNA methylase, putative                                                                |             |
| PM1163                     | ribonuclease P                                                           | <i>rnpA</i> | PM1088                                                | ribosomal protein L11                                                                | <i>rpL11</i> | PM1857                                               | rRNA methyltransferase, putative                                                        |             |
| PM1876                     | ribonuclease PH                                                          | <i>rph</i>  | PM1142                                                | ribosomal protein L31                                                                | <i>rpL31</i> | PM1866                                               | rRNA methyltransferase, putative                                                        |             |
| <i>Other</i>               |                                                                          |             | PM1150                                                | ribosomal protein L33                                                                | <i>rpL33</i> | PM1953                                               | tRNA/rRNA methyltransferase                                                             |             |
| PM1447                     | transcription accessory protein, putative                                | <i>tex</i>  | PM1151                                                | ribosomal protein L28                                                                | <i>rpL28</i> | <i>Translation factors</i>                           |                                                                                         |             |
| <b>PROTEIN SYNTHESIS</b>   |                                                                          |             | PM1162                                                | ribosomal protein L34                                                                | <i>rpL34</i> | PM0100                                               | translation elongation factor P                                                         | <i>efp</i>  |
| <i>tRNA aminoacylation</i> |                                                                          |             | PM1177                                                | ribosomal protein L9                                                                 | <i>rpL9</i>  | PM0190                                               | peptide chain release factor 2                                                          | <i>prfB</i> |
| PM0189                     | lysine--tRNA ligase, lysyl-tRNA synthetase                               | <i>lysU</i> | PM1178                                                | ribosomal protein S18                                                                | <i>rpS18</i> | PM0555                                               | peptide chain release factor 1                                                          | <i>prfA</i> |
| PM0202                     | lysine--tRNA ligase, lysyl-tRNA synthetase                               | <i>lysU</i> | PM1180                                                | ribosomal protein S6                                                                 | <i>rpS6</i>  | PM0602                                               | translation initiation factor IF-3                                                      | <i>infC</i> |
| PM0258                     | seryl-tRNA ligase, serine-tRNA synthetase                                | <i>serS</i> | PM1239                                                | ribosomal protein S21                                                                | <i>rpS21</i> | PM0759                                               | translation initiation factor 2                                                         | <i>infB</i> |
| PM0303                     | methionine--tRNA ligase, methionyl-tRNA synthetase                       | <i>metG</i> | PM1298                                                | ribosomal protein L19                                                                | <i>rpL19</i> | PM0816                                               | peptide chain release factor 3                                                          | <i>prfC</i> |
| PM0528                     | glutamine--tRNA ligase, glutaminyl-tRNA synthetase                       | <i>glnS</i> | PM1354                                                | ribosomal protein S12                                                                | <i>rpS12</i> | PM1031                                               | translation initiation factor 1                                                         | <i>infA</i> |
| PM0551                     | arginine--tRNA ligase, arginyl-tRNA synthetase                           | <i>argS</i> | PM1355                                                | ribosomal protein S7                                                                 | <i>rpS7</i>  | PM1356                                               | translation elongation factor EF-G                                                      | <i>fusA</i> |
| PM0593                     | threonine--tRNA ligase, threonyl-tRNA synthetase                         | <i>thrS</i> | PM1389                                                | ribosomal protein L17                                                                | <i>rpL17</i> | PM1357                                               | translation elongation factor EF-Tu                                                     | <i>tufA</i> |
| PM0629                     | phenylalanine--tRNA ligase, phenylalanyl-tRNA synthetase                 | <i>pheT</i> | PM1391                                                | ribosomal protein S4                                                                 | <i>rpS4</i>  | PM1746                                               | translation elongation factor EF-Tu                                                     | <i>tufB</i> |
| PM0631                     | phenylalanine--tRNA ligase, phenylalanyl-tRNA synthetase                 | <i>pheT</i> | PM1392                                                | ribosomal protein S11                                                                | <i>rpS11</i> | PM1766                                               | selenocysteine-specific elongation factor                                               | <i>selB</i> |
| PM0643                     | asparagine--tRNA ligase, asparaginyl-tRNA synthetase                     | <i>asnS</i> | PM1393                                                | ribosomal protein S13                                                                | <i>rpS13</i> | PM1985                                               | translation elongation factor EF-Ts                                                     | <i>tsf</i>  |
| PM0684                     | glutamine--tRNA ligase, glutaminyl-tRNA synthetase                       | <i>gltX</i> | PM1394                                                | ribosomal protein L36                                                                | <i>rpL36</i> | PM1987                                               | ribosome recycling factor, releasing factor                                             | <i>errf</i> |
| PM0755                     | tyrosine--tRNA ligase, tyrosyl-tRNA synthetase                           | <i>tyrS</i> | PM1396                                                | ribosomal protein L15                                                                | <i>rpL15</i> | <i>Other</i>                                         |                                                                                         |             |
| PM0818                     | valine--tRNA ligase, valyl-tRNA synthetase                               | <i>valS</i> | PM1397                                                | ribosomal protein L30                                                                | <i>rpL30</i> | PM0164                                               | peptidyl-tRNA hydrolase                                                                 | <i>pth</i>  |
| PM0945                     | cysteine--tRNA ligase, cysteinyl-tRNA synthetase                         | <i>cysS</i> | PM1398                                                | ribosomal protein S5                                                                 | <i>rpS5</i>  | PM0217                                               | small protein B                                                                         | <i>smpB</i> |
| PM0983                     | aspartate--tRNA ligase, aspartyl-tRNA synthetase                         | <i>aspS</i> | PM1399                                                | ribosomal protein L18                                                                | <i>rpL18</i> | PM0769                                               | ATP-dependent helicase                                                                  | <i>hrpA</i> |
| PM1098                     | glycine--tRNA ligase, glycyl-tRNA synthetase                             | <i>glyQ</i> | PM1400                                                | ribosomal protein L6                                                                 | <i>rpL6</i>  | PM1112                                               | ATP-dependent RNA helicase                                                              | <i>deaD</i> |
| PM1102                     | glycine--tRNA ligase beta chain, glycyl-tRNA synthetase beta chain       | <i>glyS</i> | PM1401                                                | ribosomal protein S8                                                                 | <i>rpS8</i>  | PM1840                                               | ATP-dependent RNA helicase                                                              | <i>srmB</i> |
| PM1115                     | glutamate--tRNA ligase, glutamyl-tRNA synthetase                         | <i>gltX</i> | PM1402                                                | ribosomal protein S14                                                                | <i>rpS14</i> | <b>PROTEIN FATE</b>                                  |                                                                                         |             |
| PM1214                     | leucine tRNA ligase, leucyl-tRNA synthetase                              | <i>leuS</i> | PM1403                                                | ribosomal protein L5                                                                 | <i>rpL5</i>  | <i>Protein and peptide secretion and trafficking</i> |                                                                                         |             |
| PM1287                     | alanine--tRNA ligase, alanyl-tRNA synthetase                             | <i>alaS</i> | PM1404                                                | ribosomal protein L24                                                                | <i>rpL24</i> | PM0062                                               | signal peptidase I                                                                      | <i>lepB</i> |
| PM1370                     | proline--tRNA ligase, prolyl-tRNA synthetase                             | <i>proS</i> | PM1405                                                | ribosomal protein L14                                                                | <i>rpL14</i> | PM0085                                               | protein transport protein                                                               | <i>hofB</i> |
| PM1560                     | methionyl-tRNA formyltransferase                                         | <i>fmt</i>  | PM1406                                                | ribosomal protein S17                                                                | <i>rpS17</i> | PM0086                                               | protein transport protein                                                               | <i>hofC</i> |
| PM1621                     | tryptophan--tRNA ligase, tryptophanyl-tRNA synthetase                    | <i>trpS</i> | PM1407                                                | ribosomal protein L29                                                                | <i>rpL29</i> | PM0087                                               | putative type 4 prepilin-like protein specific leader peptidase                         | <i>hopD</i> |
|                            |                                                                          |             | PM1408                                                | ribosomal protein L16                                                                | <i>rpL16</i> | PM0208                                               | protein-export membrane protein                                                         | <i>secG</i> |
|                            |                                                                          |             | PM1409                                                | ribosomal protein S3                                                                 | <i>rpS3</i>  | PM0226                                               | protein-export membrane protein                                                         | <i>secF</i> |
|                            |                                                                          |             | PM1410                                                | ribosomal protein L22                                                                | <i>rpL22</i> | PM0227                                               | protein-export membrane protein                                                         | <i>secD</i> |
|                            |                                                                          |             | PM1411                                                | ribosomal protein S19                                                                | <i>rpS19</i> |                                                      |                                                                                         |             |
|                            |                                                                          |             | PM1412                                                | ribosomal protein L2                                                                 | <i>rpL2</i>  |                                                      |                                                                                         |             |
|                            |                                                                          |             | PM1413                                                | ribosomal protein L23                                                                | <i>rpL23</i> |                                                      |                                                                                         |             |
|                            |                                                                          |             | PM1414                                                | ribosomal protein L4                                                                 | <i>rpL4</i>  |                                                      |                                                                                         |             |
|                            |                                                                          |             | PM1415                                                | ribosomal protein L3                                                                 | <i>rpL3</i>  |                                                      |                                                                                         |             |
|                            |                                                                          |             | PM1416                                                | ribosomal protein S10                                                                | <i>rpS10</i> |                                                      |                                                                                         |             |
|                            |                                                                          |             | PM1659                                                | ribosomal protein S20                                                                | <i>rpS20</i> |                                                      |                                                                                         |             |
|                            |                                                                          |             | PM1738                                                | ribosomal protein L12                                                                | <i>rpL12</i> |                                                      |                                                                                         |             |
|                            |                                                                          |             | PM1739                                                | ribosomal protein L10                                                                | <i>rpL10</i> |                                                      |                                                                                         |             |
|                            |                                                                          |             | PM1742                                                | ribosomal protein L1                                                                 | <i>rpL1</i>  |                                                      |                                                                                         |             |
|                            |                                                                          |             | PM1743                                                | ribosomal protein L11                                                                | <i>rpL11</i> |                                                      |                                                                                         |             |
|                            |                                                                          |             | PM1912                                                | ribosomal protein L32                                                                | <i>rpL32</i> |                                                      |                                                                                         |             |
|                            |                                                                          |             | PM1984                                                | ribosomal protein S2                                                                 | <i>rpS2</i>  |                                                      |                                                                                         |             |
|                            |                                                                          |             | PM0826                                                | ribosomal protein S6 modification protein                                            | <i>rimK</i>  |                                                      |                                                                                         |             |
|                            |                                                                          |             | <i>tRNA and rRNA base modification</i>                |                                                                                      |              |                                                      |                                                                                         |             |
|                            |                                                                          |             | PM0003                                                | 16S pseudouridylate 516 synthase, ribosomal small subunit pseudouridine synthetase A | <i>rsuA</i>  |                                                      |                                                                                         |             |
|                            |                                                                          |             | PM0070                                                | rRNA methyltransferase,                                                              |              |                                                      |                                                                                         |             |

|                                                            |                                                    |              |                             |                                                                   |             |        |                                                                           |              |
|------------------------------------------------------------|----------------------------------------------------|--------------|-----------------------------|-------------------------------------------------------------------|-------------|--------|---------------------------------------------------------------------------|--------------|
| PM0228                                                     | preprotein translocase                             | <i>yajC</i>  | PM0454                      | peptidase E                                                       | <i>pepE</i> | PM0754 | sugar fermentation stimulation protein                                    | <i>sfsA</i>  |
| PM0246                                                     | outer membrane lipoprotein                         | <i>lolB</i>  | PM0468                      | heat shock protein, probable protease                             | <i>htpX</i> | PM0762 | transcription regulator, putative                                         |              |
| PM0256                                                     | outer membrane lipoproteins carrier protein        | <i>lola</i>  | PM0483                      | ion protease, putative                                            |             | PM0791 | gluconate utilization system gnt-L repressor                              |              |
| PM1183                                                     | signal recognition 7particle protein               | <i>ffh</i>   | PM0585                      | protease, putative                                                | <i>sohB</i> | PM0868 | fructose repressor                                                        | <i>fruR</i>  |
| PM1219                                                     | preprotein translocase                             | <i>secA</i>  | PM0618                      | aminopeptidase N                                                  | <i>pepN</i> | PM0908 | transcriptional regulatory protein                                        | <i>tyrR</i>  |
| PM1395                                                     | preprotein translocase                             | <i>secY</i>  | PM0671                      | protease IV                                                       | <i>sppA</i> | PM0920 | guanosine-3',5'-bis (diphosphate) 3'-pyrophosphohydrolase                 | <i>spoT</i>  |
| PM1432                                                     | protein-export protein                             | <i>secB</i>  | PM0680                      | oligopeptidase A                                                  | <i>prlC</i> | PM1019 | lacZ expression regulator, Icc protein homolog                            | <i>icc</i>   |
| PM1519                                                     | cell division protein, signal recognition particle | <i>ftsY</i>  | PM0734                      | heat shock protein, periplasmic serine protease, putative         | <i>htrA</i> | PM1026 | SprT homolog                                                              | <i>sprT</i>  |
| PM1663                                                     | lipoprotein signal peptidase                       | <i>lspA</i>  | PM0748                      | protease DegS precursor                                           | <i>degS</i> | PM1037 | galactose operon repressor                                                | <i>galR</i>  |
| PM1691                                                     | sec-independent protein translocase protein        | <i>tatC</i>  | PM0804                      | zinc protease, zinc                                               | <i>pqqL</i> | PM1063 | mannitol operon repressor                                                 | <i>mtl</i>   |
| PM1745                                                     | preprotein translocase                             | <i>secE</i>  | PM0932                      | carboxypeptidase G2                                               |             | PM1135 | transcription regulator, putative                                         |              |
| <i>Protein modification and repair</i>                     |                                                    |              | PM1029                      | peptidase B                                                       | <i>pepB</i> | PM1157 | cAMP receptor protein, catabolite gene activator                          | <i>crp</i>   |
| PM0120                                                     | PmbA homolog                                       | <i>pmbA</i>  | PM1238                      | O-sialoglycoprotein endopeptidase                                 | <i>gcp</i>  | PM1181 | LexA repressor                                                            | <i>lexA</i>  |
| PM0188                                                     | beta-galactoside alpha-2,6-sialyltransferase       |              | PM1368                      | aminoacyl-histidine dipeptidase, X-his dipeptidase                | <i>pepD</i> | PM1231 | transcription regulator GntR family homolog                               | <i>gntR</i>  |
| PM0375                                                     | glutamate-ammonia-ligase adenyllyltransferase      | <i>glmE</i>  | PM1590                      | peptidase E, putative                                             | <i>pepE</i> | PM1257 | transcriptional regulator, putative                                       |              |
| PM0414                                                     | glycosyltransferase homolog                        | <i>pglA</i>  | PM1704                      | ATP-dependent Clp protease, ATPase subunit                        | <i>clpB</i> | PM1273 | transcriptional regulator, sorC family, putative                          |              |
| PM0459                                                     | methionine aminopeptidase                          | <i>map</i>   | PM1724                      | aminopeptidase P,                                                 | <i>pepP</i> | PM1283 | transcriptional activator                                                 | <i>ilvY</i>  |
| PM1559                                                     | polypeptide deformylase                            | <i>def</i>   | PM1749                      | heat shock protein, putative                                      | <i>hslV</i> | PM1288 | carbon storage regulator                                                  | <i>csrA</i>  |
| PM1569                                                     | tyrosine phosphatase, putative                     | <i>yfkJ</i>  | PM1976                      | ATP-dependent Clp protease, proteolytic subunit                   | <i>clpP</i> | PM1290 | met repressor                                                             | <i>metJ</i>  |
| <i>Protein folding and stabilization</i>                   |                                                    |              | PM1977                      | ATP-dependent Clp protease, ATP-binding subunit                   | <i>clpX</i> | PM1302 | saccharide biosynthesis regulatory protein                                | <i>opsX</i>  |
| PM0011                                                     | thiol:disulfide interchange protein                | <i>dsbE</i>  | PM1978                      | ATP-dependent proteinase                                          | <i>lon</i>  | PM1338 | regulatory protein                                                        | <i>uhpC</i>  |
| PM0028                                                     | thiol:disulfide interchange protein                | <i>dsbE</i>  | <b>REGULATORY FUNCTIONS</b> |                                                                   |             | PM1339 | sensor protein UhpB, hexose phosphate transport system regulatory protein | <i>uhpB</i>  |
| PM0046                                                     | disulfide bond formation protein B                 | <i>dsbB</i>  | <i>Other</i>                |                                                                   |             | PM1340 | transcription regulator protein                                           | <i>uhpA</i>  |
| PM0191                                                     | thiol:disulfide interchange protein                | <i>dsbC</i>  | PM0151                      | Rbs repressor homolog                                             | <i>rbsR</i> | PM1344 | deoxyribose operon repressor                                              | <i>deoR</i>  |
| PM0221                                                     | thiol:disulfide interchange protein                | <i>dsbD</i>  | PM0178                      | anti-sigma factor B antagonist, putative                          |             | PM1346 | hydrogen peroxide-inducible genes activator                               | <i>oxyR</i>  |
| PM0321                                                     | co-chaperone Hsc20                                 | <i>hscB</i>  | PM0214                      | transcriptional regulatory protein, putative                      | <i>ygiX</i> | PM1367 | glycerol-3 phosphate regulon, putative                                    |              |
| PM0322                                                     | chaperone protein, heat shock protein              | <i>hscA</i>  | PM0215                      | sensor protein, putative                                          | <i>ygiY</i> | PM1380 | hybrid histidine protein kinase-phosphate acceptor regulatory protein     | <i>cvgSY</i> |
| PM0334                                                     | heat shock protein                                 | <i>grpE</i>  | PM0219                      | aerobic respiration control protein                               | <i>arcA</i> | PM1387 | transcription regulator                                                   | <i>nadR</i>  |
| PM0736                                                     | DnaK heat shock protein 70                         | <i>DnaK</i>  | PM0254                      | leucine responsive regulatory protein                             | <i>lrp</i>  | PM1439 | glycerol-3-phosphate regulon repressor                                    | <i>glpR</i>  |
| PM0740                                                     | heat shock protein                                 | <i>dnaJ</i>  | PM0268                      | positive regulator of proline porter II, putative                 | <i>proQ</i> | PM1460 | phosphoglycerate transport system activator protein                       |              |
| PM0943                                                     | peptidyl-prolyl cis-trans isomerase B              |              | PM0296                      | biotin operon repressor/biotin acetyl coenzyme A                  | <i>birA</i> | PM1524 | regulator of the 4HPA-hydroxylase operon                                  | <i>hpaA</i>  |
| PM0944                                                     | peptidyl-prolyl cis-trans isomerase B              | <i>ppiB</i>  | PM0313                      | carboxylase synthetase aerobic respiration control sensor protein | <i>arcB</i> | PM1573 | regulatory protein AsnC                                                   | <i>asnC</i>  |
| PM1024                                                     | heat shock protein                                 | <i>htpG</i>  | PM0325                      | operon repressor                                                  | <i>trpR</i> | PM1591 | nitrate/nitrite sensor protein                                            | <i>narQ</i>  |
| PM1106                                                     | 10 KD chaperonin, heat-shock protein               | <i>groES</i> | PM0352                      | ferric uptake regulation protein                                  | <i>fur</i>  | PM1646 | SmoC-like regulatory protein                                              |              |
| PM1107                                                     | 60 KD chaperonin, heat shock protein               | <i>groEL</i> | PM0403                      | DNA binding protein HpkR, putative                                | <i>hpkR</i> | PM1678 | putative arylsulfatase regulator                                          |              |
| PM1349                                                     | FkbP-type peptidyl-prolyl cis-trans isomerase      | <i>slyD</i>  | PM0421                      | transcriptional activator protein                                 | <i>metR</i> | PM1764 | transcription regulator                                                   | <i>gntR</i>  |
| PM1567                                                     | FkbP-type peptidyl-prolyl cis-trans isomerase      | <i>fkpA</i>  | PM0431                      | phosphate regulon sensor protein                                  | <i>phoR</i> | PM1787 | sigma-E factor regulatory protein                                         | <i>rseB</i>  |
| PM1593                                                     | NapD protein                                       | <i>napD</i>  | PM0432                      | phosphate regulon transcriptional regulatory protein              | <i>phoB</i> | PM1788 | sigma-E factor negative regulatory protein                                | <i>mclA</i>  |
| PM1706                                                     | thiol:disulfide interchange protein                | <i>dsbD</i>  | PM0522                      | stringent starvation protein A                                    | <i>sspA</i> | PM1810 | nitrate/nitrite response regulator protein                                | <i>narP</i>  |
| PM1748                                                     | heat shock protein                                 | <i>hslU</i>  | PM0523                      | stringent starvation protein B                                    | <i>sspB</i> | PM1811 | adenylate cyclase                                                         | <i>cyaA</i>  |
| PM1801                                                     | thiol:disulfide interchange protein                | <i>dsbA</i>  | PM0547                      | purine nucleotide synthesis repressor                             | <i>purR</i> | PM1816 | regulatory protein recX homolog                                           | <i>recX</i>  |
| PM1878                                                     | DnaJ heat shock protein                            | <i>djlA</i>  | PM0549                      | arginine repressor                                                | <i>argR</i> | PM1847 | sucrose operon repressor                                                  | <i>scrR</i>  |
| PM1898                                                     | peptidyl-prolyl cis-trans isomerase                |              | PM0567                      | glycine cleavage system transcriptional activator                 | <i>gcvA</i> | PM1865 | GTP pyrophosphokinase                                                     | <i>relA</i>  |
| PM1975                                                     | trigger factor                                     | <i>tig</i>   | PM0600                      | putative arylsulfatase regulator                                  |             | PM1887 | transcriptional regulator in 2-component system                           | <i>cpxR</i>  |
| PM1979                                                     | peptidyl-prolyl cis-trans isomerase D, putative    |              | PM0660                      | cys regulon transcriptional activator                             | <i>cysB</i> | PM1888 | sensor protein, chemotaxis protein                                        | <i>cpxA</i>  |
| <i>Degradation of protein, peptides, and glycopeptides</i> |                                                    |              | PM0668                      | fumarate (and nitrate) reduction regulatory protein               | <i>fnr</i>  | PM1941 | transcriptional regulator, merR family, putative                          |              |
| PM0117                                                     | HflK protein                                       | <i>hflK</i>  | PM0683                      | N-acetylglucosamine repressor                                     | <i>nagC</i> | PM1945 | transcription regulator                                                   | <i>ycaN</i>  |
| PM0118                                                     | HflC protein                                       | <i>hflC</i>  | PM0724                      | tetraphosphate reductase system sensor                            | <i>ttrS</i> | PM1964 | glucitol operon repressor srlR                                            |              |
| PM0160                                                     | N-caramyl-L-amino acid amidohydrolase, putative    |              | PM0725                      | tetraphosphate reductase system response regulator                | <i>ttrR</i> | PM1967 | activator of srl operon                                                   | <i>gutM</i>  |
| PM0195                                                     | aminopeptidase A/I                                 | <i>pepA</i>  |                             |                                                                   |             | PM2004 | nitrogen regulatory protein P-                                            | <i>glnB</i>  |
| PM0233                                                     | protease, putative                                 |              |                             |                                                                   |             |        |                                                                           |              |
| PM0265                                                     | peptidase T                                        | <i>pepT</i>  |                             |                                                                   |             |        |                                                                           |              |
| PM0269                                                     | tail specific protease                             | <i>prc</i>   |                             |                                                                   |             |        |                                                                           |              |



|                                                                                        |                                                                                                                     |             |        |                                                                              |             |                                |                                                                 |             |
|----------------------------------------------------------------------------------------|---------------------------------------------------------------------------------------------------------------------|-------------|--------|------------------------------------------------------------------------------|-------------|--------------------------------|-----------------------------------------------------------------|-------------|
| II                                                                                     |                                                                                                                     |             | PM0148 | UDP-3-0-(3-hydroxymyristoyl) N-acetylglucosamine deacetylase                 | <i>lpxC</i> | PM1996                         | UDP-N-acetylglucosamine acetyltransferase                       | <i>lpxA</i> |
| <b>CELL ENVELOPE</b>                                                                   |                                                                                                                     |             | PM0187 | probable acylneuraminase                                                     | <i>neuA</i> | PM1997                         | lipid-A-disaccharide synthetase                                 | <i>lpxB</i> |
| <i>Surface structures</i>                                                              |                                                                                                                     |             | PM0362 | cytidyltransferase (kdo)2-(lauroyl)-lipid IVA acyltransferase                | <i>msbB</i> | <i>Other</i>                   |                                                                 |             |
| PM0084                                                                                 | prepilin peptidase dependent protein D                                                                              | <i>ptfA</i> | PM0463 | undecaprenyl-phosphate alpha-N-acetylglucosaminyltransferase (rfe), putative | <i>rfe</i>  | PM0080                         | prolipoprotein diacylglycerol transferase                       | <i>lgt</i>  |
| PM0663                                                                                 | sialidase precursor, neuraminidase                                                                                  |             | PM0507 | lipopolysaccharide biosynthesis protein, putative                            |             | PM0098                         | opacity associated protein                                      | <i>oopA</i> |
| PM0851                                                                                 | rough colony protein B                                                                                              | <i>rcpB</i> | PM0511 | glycosyltransferase homolog                                                  |             | PM0554                         | 15 kDa peptidoglycan-associated lipoprotein                     | <i>lpp</i>  |
| PM0852                                                                                 | rough colony protein A                                                                                              | <i>rcpA</i> | PM0512 | lsg locus, lipopolysaccharide biosynthesis protein                           |             | PM0586                         | lipoprotein plp4                                                | <i>plp4</i> |
| PM0926                                                                                 | adhesin B precursor, putative                                                                                       | <i>fimA</i> | PM0525 | KpsF protein, putative                                                       | <i>kpsF</i> | PM0627                         | hypothetical HI1314, lipoprotein                                |             |
| PM1000                                                                                 | sialidase A precursor, neuraminidase                                                                                |             | PM0558 | 2-dehydro-3-deoxyphosphooxonate aldolase                                     | <i>kdsA</i> | PM0646                         | lipoprotein LppC                                                | <i>lppC</i> |
| PM1007                                                                                 | WbjB, o-antigen locus                                                                                               | <i>wbjB</i> | PM0772 | PhyB, capsule biosynthetic locus                                             | <i>phyB</i> | PM0705                         | phosphate acetyltransferase                                     | <i>pta</i>  |
| PM1008                                                                                 | WbjC, o-antigen locus                                                                                               | <i>wbjC</i> | PM0773 | PhyA, capsule biosynthetic locus                                             | <i>phyA</i> | PM0867                         | SanA protein                                                    | <i>sanA</i> |
| PM1009                                                                                 | WbjC, o-antigen locus                                                                                               | <i>wbjD</i> | PM0774 | HyaE, capsule biosynthetic locus                                             | <i>hyaE</i> | PM1025                         | opacity protein, putative                                       | <i>opa</i>  |
| <i>Biosynthesis of murein sacculus and peptidoglycan</i>                               |                                                                                                                     |             | PM0775 | glucourosyltransferase                                                       | <i>hyaD</i> | PM1032                         | apolipoprotein N-acyltransferase                                | <i>cutE</i> |
| PM0136                                                                                 | penicillin-binding protein 3                                                                                        | <i>ftsI</i> | PM0776 | UDP-glucose 6-dehydrogenase, capsule biosynthetic locus                      | <i>hyaC</i> | PM1064                         | lipoprotein                                                     |             |
| PM0137                                                                                 | UDP-N-acetylmuramyl-tripeptide synthetase                                                                           | <i>murE</i> | PM0777 | glycosyl transferase, putative                                               | <i>hyaB</i> | PM1077                         | lipoprotein                                                     |             |
| PM0138                                                                                 | UDP-MurNAc-pentapeptide synthetase                                                                                  | <i>murF</i> | PM0778 | HexD, capsule biosynthetic locus                                             | <i>hexD</i> | PM1165                         | inner membrane protein, 60 kDa                                  | <i>gidC</i> |
| PM0139                                                                                 | phospho-N-acetylmuramoyl-pentapeptide-transferase E                                                                 | <i>mraY</i> | PM0779 | HexC, capsule biosynthetic locus                                             | <i>hexC</i> | PM1215                         | lipoprotein, putative                                           |             |
| PM0140                                                                                 | UDP-N-acetylmuramoylalanine--D-glutamate ligase                                                                     | <i>murD</i> | PM0780 | HexB, capsule biosynthetic locus                                             | <i>hexB</i> | PM1323                         | lipoprotein, putative                                           |             |
| PM0142                                                                                 | UDP-N-acetylglucosamine--N-acetylmuramyl-(pentapeptide) pyrophosphoryl-undecaprenol N-acetylglucosamine transferase | <i>murG</i> | PM0781 | HexA, capsule biosynthetic locus                                             | <i>hexA</i> | PM1347                         | membrane protein, putative                                      |             |
| PM0143                                                                                 | UDP-N-acetylmuramate--alanine ligase                                                                                | <i>murC</i> | PM0858 | 3-deoxy-D-manno-octulosonate cytidyltransferase                              | <i>kdsB</i> | PM1501                         | vacJ lipoprotein homolog                                        | <i>vacJ</i> |
| PM0144                                                                                 | D-alanine--D-alanine ligase                                                                                         | <i>ddlB</i> | PM0860 | tetracyldisaccharide 4' kinase                                               | <i>lpxK</i> | PM1512                         | membrane protein, putative                                      | <i>lapB</i> |
| PM0180                                                                                 | UDP-N-acetylglucosamine 1-carboxyvinyltransferase                                                                   | <i>murZ</i> | PM0884 | ADP-heptose synthase                                                         | <i>rfaE</i> | PM1517                         | outer membrane lipoprotein                                      | <i>plpE</i> |
| PM0324                                                                                 | monofunctional biosynthetic peptidoglycan transglycosylase                                                          |             | PM0885 | acyl transferase, lipid A biosynthesis                                       |             | PM1518                         | outer membrane lipoprotein                                      | <i>plpP</i> |
| PM0326                                                                                 | soluble lytic murein transglycosylase, putative                                                                     |             | PM1010 | lipopolysaccharide biosynthesis                                              |             | PM1613                         | lipoprotein B, putative                                         | <i>lppB</i> |
| PM0360                                                                                 | penicillin-insensitive murein endopeptidase                                                                         | <i>mepA</i> | PM1011 | undecaprenyl-phosphate galactosephosphotransferase                           | <i>rfbP</i> | PM1614                         | outer membrane antigenic lipoprotein B                          |             |
| PM0413                                                                                 | alanine racemase                                                                                                    | <i>alr</i>  | PM1015 | dTDP-glucose-4,6-dehydratase                                                 | <i>rfb</i>  | PM1720                         | lipoprotein, putative                                           |             |
| PM0456                                                                                 | penicillin-binding protein 1B                                                                                       | <i>ponB</i> | PM1016 | polysaccharide export protein Wza                                            | <i>wza</i>  | PM1730                         | outer membrane lipoprotein 2 precursor                          | <i>plpB</i> |
| PM0513                                                                                 | lytic transglycosylase                                                                                              |             | PM1018 | transmembrane protein Wzs                                                    | <i>wzs</i>  | PM2006                         | UDP-n-acetylglucosamine-peptide-n-acetylglucosaminyltransferase |             |
| PM0642                                                                                 | Mlc, making large colonies homolog                                                                                  | <i>mlc</i>  | PM1030 | dTDP-glucose 4,6-dehydratase                                                 | <i>rffG</i> |                                |                                                                 |             |
| PM0644                                                                                 | bifunctional penicillin-binding protein 1C                                                                          | <i>ponC</i> | PM1074 | phosphomannomutase                                                           | <i>yhxB</i> |                                |                                                                 |             |
| PM0716                                                                                 | penicillin binding protein 4 precursor, serine-type D-ala-D-ala-carboxypeptidase homolog                            | <i>dacB</i> | PM1140 | glycosyl transferase, putative                                               |             |                                |                                                                 |             |
| PM0903                                                                                 | N-acetylmuramoyl-L-alanine amidase                                                                                  |             | PM1141 | lipooligosaccharide biosynthesis protein                                     |             |                                |                                                                 |             |
| PM0917                                                                                 | glutamate racemase, putative                                                                                        | <i>murI</i> | PM1143 | los biosynthesis enzyme LbgA                                                 | <i>losA</i> |                                |                                                                 |             |
| PM0928                                                                                 | membrane-bound lytic murein transglycosylase A                                                                      |             | PM1144 | D-glycero-D-manno-heptosyl transferase                                       |             |                                |                                                                 |             |
| PM1230                                                                                 | penicillin-binding protein 1A                                                                                       | <i>ponA</i> | PM1304 | lipopolysaccharide core biosynthesis protein                                 | <i>kdtB</i> |                                |                                                                 |             |
| PM1589                                                                                 | UDP-N-acetylenolpyruvoylglucosamine reductase                                                                       | <i>murB</i> | PM1305 | 3-deoxy-d-manno-octulosonic-acid transferase                                 | <i>kdtA</i> |                                |                                                                 |             |
| PM1806                                                                                 | UDP-N-acetylglucosamine pyrophosphorylase                                                                           | <i>glmU</i> | PM1306 | glycosyl transferase, putative                                               |             |                                |                                                                 |             |
| PM1924                                                                                 | penicillin-binding protein 2                                                                                        | <i>pbp2</i> | PM1321 | membrane-bound lytic murein transglycosylase A                               | <i>mltC</i> |                                |                                                                 |             |
| PM1925                                                                                 | rod shape-determining protein                                                                                       | <i>rodA</i> | PM1342 | ADP-L-glycero-D-mannoheptose-6-epimerase                                     | <i>rfaD</i> |                                |                                                                 |             |
| PM1927                                                                                 | penicillin-binding protein 5, serine-type D-Ala-D-Ala carboxypeptidase                                              | <i>dacA</i> | PM1562 | glycosyl transferase, putative                                               |             |                                |                                                                 |             |
| PM1955                                                                                 | rod shape-determining protein                                                                                       | <i>mreB</i> | PM1844 | ADP-heptose--LPS heptosyltransferase II                                      | <i>rfaF</i> |                                |                                                                 |             |
| PM1956                                                                                 | rod shape-determining protein                                                                                       | <i>mreC</i> | PM1993 | Skp, lipid A biosynthesis                                                    | <i>skp</i>  |                                |                                                                 |             |
| PM1957                                                                                 | rod shape-determining protein                                                                                       | <i>mreD</i> | PM1994 | UDP-3-O-[3-hydroxymyristoyl] glucosamine n-acyltransferase                   | <i>firA</i> |                                |                                                                 |             |
| <i>Biosynthesis and degradation of surface polysaccharides and lipopolysaccharides</i> |                                                                                                                     |             |        |                                                                              |             | <b>CELLULAR PROCESSES</b>      |                                                                 |             |
| PM0122                                                                                 | phosphoheptose isomerase                                                                                            | <i>gmhA</i> |        |                                                                              |             | <i>Cell Division</i>           |                                                                 |             |
|                                                                                        |                                                                                                                     |             |        |                                                                              |             | PM0104                         | SufI protein                                                    | <i>sufI</i> |
|                                                                                        |                                                                                                                     |             |        |                                                                              |             | PM0135                         | cell division protein                                           | <i>ftsL</i> |
|                                                                                        |                                                                                                                     |             |        |                                                                              |             | PM0141                         | cell division protein                                           | <i>ftsW</i> |
|                                                                                        |                                                                                                                     |             |        |                                                                              |             | PM0145                         | cell division protein                                           | <i>ftsQ</i> |
|                                                                                        |                                                                                                                     |             |        |                                                                              |             | PM0146                         | cell division protein                                           | <i>ftsA</i> |
|                                                                                        |                                                                                                                     |             |        |                                                                              |             | PM0147                         | cell division protein                                           | <i>ftsZ</i> |
|                                                                                        |                                                                                                                     |             |        |                                                                              |             | PM0255                         | cell division protein                                           | <i>ftsK</i> |
|                                                                                        |                                                                                                                     |             |        |                                                                              |             | PM0289                         | cell cycle protein                                              | <i>mesJ</i> |
|                                                                                        |                                                                                                                     |             |        |                                                                              |             | PM0342                         | cytoplasmic filament protein                                    | <i>cafA</i> |
|                                                                                        |                                                                                                                     |             |        |                                                                              |             | PM0437                         | cell division protein                                           | <i>ftsJ</i> |
|                                                                                        |                                                                                                                     |             |        |                                                                              |             | PM0438                         | cell division protein                                           | <i>ftsH</i> |
|                                                                                        |                                                                                                                     |             |        |                                                                              |             | PM0443                         | cell division inhibitor                                         | <i>minC</i> |
|                                                                                        |                                                                                                                     |             |        |                                                                              |             | PM0548                         | cell division inhibitor homolog H                               |             |
|                                                                                        |                                                                                                                     |             |        |                                                                              |             | PM0609                         | cell division protein                                           | <i>mukB</i> |
|                                                                                        |                                                                                                                     |             |        |                                                                              |             | PM1520                         | cell division ATP-binding protein                               | <i>ftsE</i> |
|                                                                                        |                                                                                                                     |             |        |                                                                              |             | PM1521                         | cell division protein                                           | <i>ftsX</i> |
|                                                                                        |                                                                                                                     |             |        |                                                                              |             | PM1695                         | cell division protein                                           | <i>zipA</i> |
|                                                                                        |                                                                                                                     |             |        |                                                                              |             | <i>Chemotaxis and motility</i> |                                                                 |             |
|                                                                                        |                                                                                                                     |             |        |                                                                              |             | PM0714                         | hsf homolog, locus encoding surface fibrils                     | <i>hsf</i>  |
|                                                                                        |                                                                                                                     |             |        |                                                                              |             | PM0855                         | fimbrial protein                                                |             |
|                                                                                        |                                                                                                                     |             |        |                                                                              |             | PM1570                         | hsf homolog, locus encoding surface fibrils                     | <i>hsf</i>  |
|                                                                                        |                                                                                                                     |             |        |                                                                              |             | PM2008                         | fimbrial biogenesis and twitching motility protein, putative    |             |
|                                                                                        |                                                                                                                     |             |        |                                                                              |             | <i>Detoxification</i>          |                                                                 |             |
|                                                                                        |                                                                                                                     |             |        |                                                                              |             | PM0001                         | superoxide dismutase                                            | <i>sodA</i> |
|                                                                                        |                                                                                                                     |             |        |                                                                              |             | PM0032                         | catalase                                                        | <i>hkeE</i> |
|                                                                                        |                                                                                                                     |             |        |                                                                              |             | PM0795                         | alkylhydrogenperoxide reductase                                 | <i>tsoA</i> |



|        |                                                        |        |                                              |        |                                         |
|--------|--------------------------------------------------------|--------|----------------------------------------------|--------|-----------------------------------------|
| PM0354 | hypothetical <i>E. coli</i>                            | PM0595 | hypothetical <i>H. pylori</i>                | PM0888 | hypothetical <i>D. radiodurans</i>      |
| PM0358 | hypothetical HI0195                                    | PM0596 | hypothetical HI0806                          | PM0889 | hypothetical <i>E. coli</i>             |
| PM0361 | hypothetical HI0198                                    | PM0597 | hypothetical HI10198                         | PM0891 | hypothetical HI1545                     |
| PM0366 | hypothetical HI1627                                    | PM0598 | hypothetical HI1316                          | PM0899 | hypothetical HI1714                     |
| PM0367 | hypothetical HI1626                                    | PM0599 | hypothetical HI0804                          | PM0900 | hypothetical HI1715                     |
| PM0368 | hypothetical HI1625                                    | PM0601 | hypothetical HI1317                          | PM0902 | hypothetical HI0065                     |
| PM0372 | hypothetical <i>H. pylori</i>                          | PM0606 | hypothetical HI1371.1                        | PM0909 | hypothetical HI0043                     |
| PM0374 | hypothetical <i>R. prowazekii</i>                      | PM0610 | hypothetical HI1376                          | PM0910 | hypothetical HI1637                     |
| PM0382 | hypothetical HI688                                     | PM0616 | hypothetical HI1400                          | PM0923 | hypothetical <i>E. coli</i>             |
| PM0383 | hypothetical HI1687                                    | PM0626 | hypothetical <i>E. coli</i>                  | PM0927 | hypothetical HI0118                     |
| PM0384 | hypothetical HI1686                                    | PM0632 | hypothetical yeast                           | PM0929 | hypothetical HI0121                     |
| PM0387 | hypothetical <i>H. influenzae</i>                      | PM0633 | hypothetical HI0042                          | PM0933 | hypothetical <i>E. coli</i>             |
| PM0391 | hypothetical HI1202                                    | PM0638 | hypothetical <i>E. coli</i>                  | PM0934 | hypothetical HI1241                     |
| PM0392 | hypothetical HI1680                                    | PM0640 | hypothetical HI1629                          | PM0935 | hypothetical HI1240                     |
| PM0393 | hypothetical <i>E. coli</i>                            | PM0645 | hypothetical HI1654                          | PM0942 | hypothetical HI0081                     |
| PM0395 | hypothetical HI1681                                    | PM0647 | hypothetical HI1656                          | PM0948 | hypothetical <i>E. coli</i>             |
| PM0401 | hypothetical HI1371                                    | PM0648 | hypothetical HI1657                          | PM0949 | hypothetical HI0135                     |
| PM0402 | hypothetical HI0044                                    | PM0651 | hypothetical HI1612                          | PM0950 | hypothetical HI0134                     |
| PM0417 | hypothetical HI1476                                    | PM0652 | hypothetical <i>E. coli</i>                  | PM0958 | hypothetical HI0012                     |
| PM0422 | hypothetical HI1738                                    | PM0659 | hypothetical <i>R. prowazekii</i>            | PM0962 | hypothetical HI0941                     |
| PM0423 | hypothetical HI1737                                    | PM0661 | hypothetical HI1199                          | PM0963 | hypothetical HI0940                     |
| PM0424 | hypothetical HI1736                                    | PM0662 | hypothetical HI1198                          | PM0964 | hypothetical HI0939                     |
| PM0426 | hypothetical HI1249                                    | PM0669 | hypothetical HI1426                          | PM0965 | hypothetical HI0938                     |
| PM0427 | hypothetical HI1248                                    | PM0672 | hypothetical HI1542                          | PM0971 | hypothetical HI0386                     |
| PM0428 | hypothetical <i>E. coli</i>                            | PM0673 | hypothetical HI1326                          | PM0975 | hypothetical HI0310                     |
| PM0441 | hypothetical HI0441                                    | PM0675 | hypothetical HI0182                          | PM0980 | hypothetical HI0315                     |
| PM0444 | hypothetical HI1446                                    | PM0686 | hypothetical <i>E. coli</i>                  | PM0984 | hypothetical HI0318                     |
| PM0448 | hypothetical <i>Y. pestis</i>                          | PM0687 | hypothetical HI1265                          | PM0985 | hypothetical HI0319/3                   |
| PM0449 | hypothetical <i>Y. pestis</i>                          | PM0688 | hypothetical HI1628                          | PM0989 | hypothetical HI0325                     |
| PM0451 | hypothetical <i>Y. pestis</i>                          | PM0690 | hypothetical <i>A. actinomycetemcomitans</i> | PM0990 | hypothetical <i>A. pleuropneumoniae</i> |
| PM0452 | hypothetical <i>Y. pestis</i>                          | PM0696 | hypothetical <i>T. maritima</i>              | PM0997 | hypothetical <i>E. coli</i>             |
| PM0453 | hypothetical <i>Y. pestis</i>                          | PM0703 | hypothetical HI1205                          | PM1001 | hypothetical HI0019                     |
| PM0455 | hypothetical <i>E. coli</i>                            | PM0708 | hypothetical HI0389                          | PM1002 | hypothetical <i>E. coli</i>             |
| PM0457 | hypothetical HI1724                                    | PM0709 | hypothetical HI0388                          | PM1003 | hypothetical <i>S. sonnei</i>           |
| PM0458 | hypothetical HI1723                                    | PM0711 | hypothetical HI1317                          | PM1006 | hypothetical <i>Synechocystis</i> sp.   |
| PM0461 | hypothetical <i>B. subtilis</i>                        | PM0712 | hypothetical <i>R. prowazekii</i>            | PM1013 | hypothetical <i>T. maritima</i>         |
| PM0464 | hypothetical <i>E. coli</i>                            | PM0713 | hypothetical HI1333                          | PM1020 | hypothetical HI0398                     |
| PM0465 | hypothetical HI1452                                    | PM0720 | hypothetical HI1309                          | PM1021 | hypothetical HI0101                     |
| PM0466 | hypothetical <i>E. coli</i>                            | PM0727 | hypothetical HI1307                          | PM1023 | hypothetical HI0103                     |
| PM0469 | hypothetical HI1563                                    | PM0735 | hypothetical HI1236                          | PM1042 | hypothetical <i>N. meningitidis</i>     |
| PM0471 | hypothetical <i>E. coli</i>                            | PM0747 | hypothetical <i>E. coli</i>                  | PM1043 | hypothetical <i>E. coli</i>             |
| PM0473 | hypothetical <i>A. pernix</i>                          | PM0750 | hypothetical HI0943                          | PM1045 | hypothetical HI0004                     |
| PM0475 | hypothetical <i>E. coli</i>                            | PM0761 | hypothetical HI1282                          | PM1047 | hypothetical <i>B. subtilis</i>         |
| PM0476 | hypothetical HI1291                                    | PM0763 | hypothetical <i>E. coli</i>                  | PM1048 | hypothetical <i>Synechocystis</i> sp.   |
| PM0477 | hypothetical HI1292                                    | PM0770 | hypothetical HI1073                          | PM1049 | hypothetical HI0687                     |
| PM0478 | hypothetical HI1436                                    | PM0771 | hypothetical HI1074                          | PM1050 | hypothetical HI0256                     |
| PM0479 | hypothetical HI1435                                    | PM0782 | hypothetical HI1165                          | PM1054 | hypothetical HI0491                     |
| PM0482 | hypothetical HI1323                                    | PM0783 | hypothetical <i>T. maritima</i>              | PM1055 | hypothetical HI0489                     |
| PM0485 | hypothetical HI1434                                    | PM0787 | hypothetical HI1163                          | PM1057 | hypothetical HI0488                     |
| PM0487 | hypothetical <i>B. anthracis</i>                       | PM0788 | hypothetical HI1161                          | PM1058 | hypothetical HI0487                     |
| PM0506 | hypothetical HI1701                                    | PM0796 | hypothetical HI1225                          | PM1060 | hypothetical HI0650                     |
| PM0508 | hypothetical HI1699                                    | PM0798 | hypothetical HI1223                          | PM1066 | hypothetical HI0056                     |
| PM0509 | hypothetical protein 1 <i>A. actinomycetemcomitans</i> | PM0799 | hypothetical HI1222                          | PM1070 | hypothetical HI0400                     |
| PM0510 | hypothetical protein 2 <i>A. actinomycetemcomitans</i> | PM0803 | hypothetical HI1369                          | PM1071 | hypothetical HI0035                     |
| PM0514 | hypothetical <i>E. coli</i>                            | PM0809 | hypothetical HI0461                          | PM1073 | hypothetical HI0966                     |
| PM0515 | hypothetical <i>E. coli</i>                            | PM0814 | hypothetical <i>E. coli</i>                  | PM1080 | hypothetical <i>S. dysenteriae</i>      |
| PM0519 | hypothetical <i>E. coli</i>                            | PM0817 | hypothetical HI1349                          | PM1087 | hypothetical HI0979                     |
| PM0524 | hypothetical HI1679                                    | PM0821 | hypothetical <i>D. radiodurans</i>           | PM1090 | hypothetical HI0974.1                   |
| PM0527 | hypothetical HI1462                                    | PM0824 | hypothetical HI1399                          | PM1097 | hypothetical <i>S. coelicolor</i>       |
| PM0529 | hypothetical HI0183                                    | PM0825 | hypothetical <i>E. coli</i>                  | PM1099 | hypothetical HI0926                     |
| PM0536 | hypothetical HI1450                                    | PM0835 | hypothetical HI1104                          | PM1113 | hypothetical HI0230                     |
| PM0537 | hypothetical <i>E. coli</i>                            | PM0836 | hypothetical HI1168                          | PM1116 | hypothetical <i>A. pleuropneumoniae</i> |
| PM0539 | hypothetical HI1355                                    | PM0842 | hypothetical HI1253                          | PM1128 | hypothetical HI0234                     |
| PM0552 | hypothetical HI1582/1                                  | PM0853 | hypothetical <i>A. actinomycetemcomitans</i> | PM1129 | hypothetical HI0235                     |
| PM0557 | hypothetical HI1558                                    | PM0854 | hypothetical <i>A. actinomycetemcomitans</i> | PM1133 | hypothetical <i>E. coli</i>             |
| PM0560 | hypothetical HI1555                                    | PM0859 | hypothetical <i>E. coli</i>                  | PM1134 | hypothetical HI0894                     |
| PM0562 | hypothetical HI1548                                    | PM0871 | hypothetical HI1586                          | PM1136 | hypothetical HI0896                     |
| PM0568 | hypothetical HI1195                                    | PM0879 | hypothetical HI1298                          | PM1139 | hypothetical HI0258/2                   |
| PM0569 | hypothetical HI0077                                    | PM0880 | hypothetical HI1297                          | PM1156 | hypothetical <i>E. coli</i>             |
| PM0574 | hypothetical HI1159                                    | PM0881 | hypothetical HI1296                          | PM1158 | hypothetical HI0095                     |
| PM0575 | hypothetical HI1301                                    | PM0883 | hypothetical HI1293/94                       | PM1164 | hypothetical HI1000                     |
| PM0587 | hypothetical <i>E. coli</i>                            | PM0886 | hypothetical HI1543                          | PM1167 | hypothetical HI0608                     |
| PM0591 | hypothetical                                           |        |                                              | PM1170 | hypothetical HI0510                     |

|        |                                       |        |                                       |        |                                       |
|--------|---------------------------------------|--------|---------------------------------------|--------|---------------------------------------|
| PM1171 | hypothetical <i>E. coli</i>           | PM1487 | hypothetical HI0485                   | PM1717 | hypothetical <i>E. coli</i>           |
| PM1172 | hypothetical <i>B. subtilis</i>       | PM1496 | hypothetical HI0721                   | PM1718 | hypothetical HI0175                   |
| PM1174 | hypothetical <i>H. influenzae</i>     | PM1497 | hypothetical HI0722                   | PM1721 | hypothetical HI0858                   |
| PM1184 | hypothetical <i>E. coli</i>           | PM1500 | hypothetical <i>E. coli</i>           | PM1722 | hypothetical HI0857                   |
| PM1185 | hypothetical HI0107                   | PM1503 | hypothetical <i>Synechosystis sp.</i> | PM1723 | hypothetical HI0817                   |
| PM1190 | hypothetical yeast                    | PM1504 | hypothetical <i>S. coelicolor</i>     | PM1727 | hypothetical HI0621                   |
| PM1194 | hypothetical HI0912                   | PM1507 | hypothetical HI0756                   | PM1733 | hypothetical HI0431                   |
| PM1211 | hypothetical HI1048                   | PM1508 | hypothetical HI0755                   | PM1735 | hypothetical HI0432                   |
| PM1220 | hypothetical HI0908                   | PM1511 | hypothetical HI1118                   | PM1741 | hypothetical HI0091                   |
| PM1221 | hypothetical HI0907                   | PM1515 | hypothetical HI0974                   | PM1753 | hypothetical HI0647                   |
| PM1232 | hypothetical <i>B. subtilis</i>       | PM1516 | hypothetical HI0767                   | PM1757 | hypothetical HI1044                   |
| PM1233 | hypothetical <i>B. subtilis</i>       | PM1544 | hypothetical <i>E. coli</i>           | PM1758 | hypothetical HI1043                   |
| PM1243 | hypothetical <i>E. coli</i>           | PM1545 | hypothetical <i>E. coli</i>           | PM1759 | hypothetical <i>S. pneumoniae</i>     |
| PM1252 | hypothetical HI1028                   | PM1546 | hypothetical HI0562                   | PM1760 | hypothetical <i>S. pneumoniae</i>     |
| PM1253 | hypothetical HI1029                   | PM1547 | hypothetical HI0810                   | PM1761 | hypothetical <i>S. pneumoniae</i>     |
| PM1254 | hypothetical HI1030                   | PM1555 | hypothetical <i>B. subtilis</i>       | PM1762 | hypothetical <i>S. pneumoniae</i>     |
| PM1255 | hypothetical <i>E. coli</i>           | PM1565 | hypothetical HI0700                   | PM1765 | hypothetical <i>S. pneumoniae</i>     |
| PM1256 | hypothetical HI1031                   | PM1568 | hypothetical <i>H. pylori</i>         | PM1770 | hypothetical <i>C. elegans</i>        |
| PM1258 | hypothetical HI0507                   | PM1571 | hypothetical <i>E. coli</i>           | PM1784 | hypothetical HI0852                   |
| PM1259 | hypothetical                          | PM1575 | hypothetical <i>E. coli</i>           | PM1786 | hypothetical HI0850                   |
| PM1264 | hypothetical HI0358                   | PM1576 | hypothetical <i>E. coli</i>           | PM1790 | hypothetical HI0627                   |
| PM1267 | hypothetical HI0500                   | PM1577 | hypothetical <i>E. coli</i>           | PM1798 | hypothetical HI0449                   |
| PM1268 | hypothetical <i>E. coli</i>           | PM1580 | hypothetical <i>A. fulgidus</i>       | PM1800 | hypothetical HI0845                   |
| PM1269 | hypothetical HI0657                   | PM1581 | hypothetical <i>M. jannaschii</i>     | PM1802 | hypothetical HI0847                   |
| PM1270 | hypothetical HI0656                   | PM1585 | hypothetical <i>L. borgpetersenii</i> | PM1804 | hypothetical HI0849                   |
| PM1278 | hypothetical <i>E. coli</i>           | PM1586 | hypothetical <i>E. coli</i>           | PM1808 | hypothetical HI0696                   |
| PM1279 | hypothetical <i>E. coli</i>           | PM1604 | hypothetical <i>E. coli</i>           | PM1809 | hypothetical HI0698                   |
| PM1281 | hypothetical HI0680                   | PM1605 | hypothetical HI0694                   | PM1814 | hypothetical HI0602                   |
| PM1292 | hypothetical HI0519                   | PM1607 | hypothetical HI0673                   | PM1828 | hypothetical                          |
| PM1293 | hypothetical HI0522                   | PM1608 | hypothetical HI0672                   | PM1831 | hypothetical HI0753                   |
| PM1294 | hypothetical HI0523                   | PM1609 | hypothetical HI0671                   | PM1834 | hypothetical HI0725                   |
| PM1299 | hypothetical HI0585                   | PM1610 | hypothetical HI0701                   | PM1835 | hypothetical HI0724                   |
| PM1303 | hypothetical HI0260                   | PM1611 | hypothetical <i>E. coli</i>           | PM1838 | hypothetical HI1077                   |
| PM1307 | hypothetical <i>M. barkeri</i>        | PM1615 | hypothetical HI0670                   | PM1839 | hypothetical HI0423                   |
| PM1310 | hypothetical HI1273                   | PM1617 | hypothetical HI0277                   | PM1850 | hypothetical HI0638                   |
| PM1312 | hypothetical HI0677                   | PM1618 | hypothetical <i>M. tuberculosis</i>   | PM1853 | hypothetical <i>E. coli</i>           |
| PM1313 | hypothetical <i>E. coli</i>           | PM1626 | hypothetical <i>E. coli</i>           | PM1855 | hypothetical <i>E. coli</i>           |
| PM1314 | hypothetical HI1036                   | PM1629 | hypothetical HI0597                   | PM1859 | hypothetical HI0526,                  |
| PM1316 | hypothetical HI0341                   | PM1641 | hypothetical <i>Synechocystis sp.</i> | PM1862 | hypothetical HI0874                   |
| PM1317 | hypothetical HI0340                   | PM1642 | hypothetical <i>E. coli</i>           | PM1863 | hypothetical HI0874                   |
| PM1318 | hypothetical                          | PM1644 | hypothetical HI1028                   | PM1868 | hypothetical HI0303                   |
| PM1320 | hypothetical HI0760                   | PM1648 | hypothetical <i>E. coli</i>           | PM1869 | hypothetical HI0304                   |
| PM1335 | hypothetical HI0173                   | PM1649 | hypothetical <i>E. coli</i>           | PM1870 | hypothetical HI0305                   |
| PM1345 | hypothetical HI0570                   | PM1650 | hypothetical <i>B. halodurans</i>     | PM1874 | hypothetical HI0466                   |
| PM1350 | hypothetical HI0575                   | PM1651 | hypothetical <i>E. coli</i>           | PM1875 | hypothetical HI0467                   |
| PM1351 | hypothetical HI0576                   | PM1656 | hypothetical HI1034                   | PM1879 | hypothetical <i>E. coli</i>           |
| PM1352 | hypothetical HI0576.1                 | PM1665 | hypothetical HI1008                   | PM1880 | hypothetical HI0270                   |
| PM1353 | hypothetical HI0577                   | PM1666 | hypothetical HI0260                   | PM1881 | hypothetical <i>E. coli</i>           |
| PM1358 | hypothetical <i>T. maritima</i>       | PM1668 | hypothetical <i>L. monocytogenes</i>  | PM1882 | hypothetical HI0842                   |
| PM1360 | hypothetical HI1014                   | PM1669 | hypothetical HI0463                   | PM1883 | hypothetical HI0842                   |
| PM1362 | hypothetical <i>T. maritima</i>       | PM1672 | hypothetical HI0457                   | PM1884 | hypothetical HI0840                   |
| PM1363 | hypothetical HI1013                   | PM1674 | hypothetical <i>E. coli</i>           | PM1885 | hypothetical HI0839                   |
| PM1364 | hypothetical HI1012                   | PM1675 | hypothetical <i>E. coli</i>           | PM1886 | hypothetical HI0838                   |
| PM1365 | hypothetical HI1011                   | PM1676 | hypothetical HI0453                   | PM1889 | hypothetical HI0862                   |
| PM1375 | hypothetical <i>E. coli</i>           | PM1677 | hypothetical HI0452                   | PM1894 | hypothetical HI0108                   |
| PM1376 | hypothetical <i>Rhizobium sp.</i>     | PM1679 | hypothetical <i>A. vitis</i>          | PM1895 | hypothetical <i>E. coli</i>           |
| PM1388 | hypothetical HI0762                   | PM1681 | hypothetical <i>A. vitis</i>          | PM1902 | hypothetical HI1552                   |
| PM1417 | hypothetical HI0633                   | PM1682 | hypothetical <i>E. coli</i>           | PM1911 | hypothetical HI0159                   |
| PM1418 | hypothetical HI0634                   | PM1683 | hypothetical HI1246                   | PM1922 | hypothetical HI0034                   |
| PM1429 | hypothetical HI0607                   | PM1685 | hypothetical <i>E. coli</i>           | PM1923 | hypothetical HI0033                   |
| PM1433 | hypothetical HI0744                   | PM1685 | hypothetical <i>E. coli</i>           | PM1926 | hypothetical HI0030                   |
| PM1435 | hypothetical <i>E. coli</i>           | PM1687 | hypothetical <i>E. coli</i>           | PM1928 | hypothetical HI0028                   |
| PM1448 | hypothetical HI0568                   | PM1689 | hypothetical HI0187                   | PM1931 | hypothetical <i>E. coli</i>           |
| PM1452 | hypothetical <i>E. coli</i>           | PM1690 | hypothetical HI0187                   | PM1937 | hypothetical                          |
| PM1461 | hypothetical HI1643                   | PM1696 | hypothetical HI0266                   | PM1938 | hypothetical <i>E. coli</i>           |
| PM1465 | hypothetical HI1169                   | PM1698 | hypothetical <i>R. capsulatus</i>     | PM1939 | hypothetical <i>S. typhimurium</i>    |
| PM1466 | hypothetical HI0719                   | PM1700 | hypothetical <i>S. marcescens</i>     | PM1943 | hypothetical <i>Synechocystis sp.</i> |
| PM1470 | hypothetical <i>B. subtilis</i>       | PM1702 | hypothetical <i>E. coli</i>           | PM1958 | hypothetical <i>E. coli</i>           |
| PM1471 | hypothetical <i>B. halodurans</i>     | PM1707 | hypothetical HI0148                   | PM1965 | hypothetical <i>E. coli</i>           |
| PM1472 | hypothetical <i>M. pneumoniae</i>     | PM1708 | hypothetical HI0147                   | PM1973 | hypothetical <i>E. coli</i>           |
| PM1477 | hypothetical <i>Synechosystis sp.</i> | PM1709 | hypothetical HI0146                   | PM1974 | hypothetical <i>E. coli</i>           |
| PM1479 | hypothetical <i>Synechosystis sp.</i> | PM1711 | hypothetical HI0145                   | PM1981 | hypothetical <i>E. coli</i>           |
| PM1480 | hypothetical <i>E. coli</i>           | PM1713 | hypothetical HI0227                   | PM1983 | hypothetical <i>E. coli</i>           |
| PM1483 | hypothetical HI0668                   | PM1714 | hypothetical HI0143                   | PM1991 | hypothetical HI0918                   |

|                      |                                              |        |         |        |         |
|----------------------|----------------------------------------------|--------|---------|--------|---------|
| PM1999               | hypothetical <i>E. coli</i>                  | PM0681 | unknown | PM1579 | unknown |
| PM2002               | hypothetical <i>E. coli</i>                  | PM0682 | unknown | PM1583 | unknown |
| PM2005               | hypothetical HI0338                          | PM0689 | unknown | PM1588 | unknown |
| PM2007               | hypothetical HI0365                          | PM0697 | unknown | PM1603 | unknown |
| PM2009               | hypothetical HI0367                          | PM0737 | unknown | PM1623 | unknown |
| PM2012               | hypothetical <i>A. actinomycetemcomitans</i> | PM0739 | unknown | PM1633 | unknown |
|                      |                                              | PM0751 | unknown | PM1634 | unknown |
|                      |                                              | PM0758 | unknown | PM1635 | unknown |
| <i>No homologues</i> |                                              | PM0767 | unknown | PM1636 | unknown |
| PM0015               | unknown                                      | PM0768 | unknown | PM1637 | unknown |
| PM0016               | unknown                                      | PM0784 | unknown | PM1643 | unknown |
| PM0090               | unknown                                      | PM0805 | unknown | PM1647 | unknown |
| PM0097               | unknown                                      | PM0812 | unknown | PM1652 | unknown |
| PM0109               | unknown                                      | PM0819 | unknown | PM1654 | unknown |
| PM0110               | unknown                                      | PM0850 | unknown | PM1655 | unknown |
| PM0111               | unknown                                      | PM0901 | unknown | PM1658 | unknown |
| PM0157               | unknown                                      | PM0918 | unknown | PM1667 | unknown |
| PM0161               | unknown                                      | PM0931 | unknown | PM1680 | unknown |
| PM0231               | unknown                                      | PM0946 | unknown | PM1699 | unknown |
| PM0234               | unknown                                      | PM0972 | unknown | PM1771 | unknown |
| PM0253               | unknown                                      | PM0979 | unknown | PM1772 | unknown |
| PM0279               | unknown                                      | PM0982 | unknown | PM1773 | unknown |
| PM0291               | unknown                                      | PM0986 | unknown | PM1775 | unknown |
| PM0294               | unknown                                      | PM0998 | unknown | PM1776 | unknown |
| PM0305               | unknown                                      | PM1004 | unknown | PM1778 | unknown |
| PM0306               | unknown                                      | PM1005 | unknown | PM1779 | unknown |
| PM0307               | unknown                                      | PM1012 | unknown | PM1780 | unknown |
| PM0308               | unknown                                      | PM1044 | unknown | PM1781 | unknown |
| PM0309               | unknown                                      | PM1075 | unknown | PM1782 | unknown |
| PM0310               | unknown                                      | PM1076 | unknown | PM1783 | unknown |
| PM0311               | unknown                                      | PM1081 | unknown | PM1805 | unknown |
| PM0312               | unknown                                      | PM1082 | unknown | PM1818 | unknown |
| PM0314               | unknown                                      | PM1083 | unknown | PM1819 | unknown |
| PM0373               | unknown                                      | PM1084 | unknown | PM1820 | unknown |
| PM0404               | unknown                                      | PM1095 | unknown | PM1821 | unknown |
| PM0415               | unknown                                      | PM1101 | unknown | PM1824 | unknown |
| PM0419               | unknown                                      | PM1105 | unknown | PM1825 | unknown |
| PM0430               | unknown                                      | PM1121 | unknown | PM1826 | unknown |
| PM0442               | unknown                                      | PM1122 | unknown | PM1827 | unknown |
| PM0474               | unknown                                      | PM1123 | unknown | PM1829 | unknown |
| PM0480               | unknown                                      | PM1124 | unknown | PM1841 | unknown |
| PM0488               | unknown                                      | PM1125 | unknown | PM1842 | unknown |
| PM0489               | unknown                                      | PM1126 | unknown | PM1843 | unknown |
| PM0490               | unknown                                      | PM1127 | unknown | PM1845 | unknown |
| PM0491               | unknown                                      | PM1146 | unknown | PM1890 | unknown |
| PM0492               | unknown                                      | PM1176 | unknown | PM1897 | unknown |
| PM0493               | unknown                                      | PM1189 | unknown | PM1919 | unknown |
| PM0494               | unknown                                      | PM1196 | unknown | PM1932 | unknown |
| PM0495               | unknown                                      | PM1201 | unknown | PM1934 | unknown |
| PM0496               | unknown                                      | PM1217 | unknown | PM1935 | unknown |
| PM0497               | unknown                                      | PM1237 | unknown | PM1936 | unknown |
| PM0498               | unknown                                      | PM1249 | unknown | PM1942 | unknown |
| PM0499               | unknown                                      | PM1282 | unknown | PM1946 | unknown |
| PM0500               | unknown                                      | PM1295 | unknown | PM1947 | unknown |
| PM0501               | unknown                                      | PM1374 | unknown | PM1948 | unknown |
| PM0502               | unknown                                      | PM1386 | unknown | PM1949 | unknown |
| PM0503               | unknown                                      | PM1428 | unknown | PM1963 | unknown |
| PM0504               | unknown                                      | PM1437 | unknown | PM1966 | unknown |
| PM0505               | unknown                                      | PM1449 | unknown | PM1972 | unknown |
| PM0530               | unknown                                      | PM1462 | unknown | PM2001 | unknown |
| PM0531               | unknown                                      | PM1467 | unknown | PM2013 | unknown |
| PM0553               | unknown                                      | PM1469 | unknown |        |         |
| PM0582               | unknown                                      | PM1478 | unknown |        |         |
| PM0590               | unknown                                      | PM1481 | unknown |        |         |
| PM0594               | unknown                                      | PM1509 | unknown |        |         |
| PM0612               | unknown                                      | PM1514 | unknown |        |         |
| PM0613               | unknown                                      | PM1526 | unknown |        |         |
| PM0614               | unknown                                      | PM1539 | unknown |        |         |
| PM0630               | unknown                                      | PM1540 | unknown |        |         |
| PM0654               | unknown                                      | PM1543 | unknown |        |         |
| PM0657               | unknown                                      | PM1551 | unknown |        |         |
| PM0670               | unknown                                      | PM1552 | unknown |        |         |
| PM0674               | unknown                                      | PM1553 | unknown |        |         |
| PM0679               | unknown                                      | PM1566 | unknown |        |         |
